1 ***Dmp1Cre*-directed knockdown of PTHrP in murine decidua is associated with**  
2 **increased bone width and a life-long increase in strength specific to male progeny**

3 Niloufar Ansari<sup>1,2,3</sup>, Tsuyoshi Isojima<sup>1,4</sup>, Blessing Crimeen-Irwin<sup>1</sup>, Ingrid J Poulton<sup>1</sup>,  
4 Narelle E. McGregor<sup>1</sup>, Patricia W. M. Ho<sup>1</sup>, Christopher S Kovacs<sup>5</sup>, Evdokia Dimitriadis<sup>6</sup>,  
5 Jonathan H Gooi<sup>1,2,7</sup>, T. John Martin<sup>1,2</sup>, Natalie A. Sims<sup>1,2,\*</sup>

6 <sup>1</sup> St. Vincent's Institute of Medical Research, Fitzroy, Victoria, Australia

7 <sup>2</sup> The University of Melbourne, Department of Medicine at St. Vincent's Hospital, Fitzroy,  
8 Victoria, Australia

9 <sup>3</sup> Current address: Drug Delivery, Disposition and Dynamics, Monash Institute of  
10 Pharmaceutical Sciences, Monash University, Parkville, Victoria, Australia

11 <sup>4</sup> Teikyo University School of Medicine, Department of Pediatrics, Tokyo, Japan

12 <sup>5</sup> Memorial University of Newfoundland, St John's, Newfoundland, Canada

13 <sup>6</sup> Department of Obstetrics and Gynecology, University of Melbourne, The Women's  
14 Hospital, Melbourne, Australia

15 <sup>7</sup> Bio21 Molecular Science and Biotechnology Institute, Parkville, Victoria, Australia

16 Corresponding author:

17 Natalie A Sims

18 9 Princes St

19 Fitzroy, Victoria 3122

20 Australia

21 Email: [nsims@svi.edu.au](mailto:nsims@svi.edu.au)

22 Phone: +613-9231-2555

23 Fax: +613-9416-2676

24 **Abstract**

25 Parathyroid hormone related-protein (PTHrP) is a pleiotropic regulator of tissue  
26 homeostasis. In bone, knockdown in osteocytes by *Dmp1Cre*-targeted deletion causes  
27 osteopenia and impaired strength. We report that this outcome depends on parental  
28 genotype. Adult *Dmp1Cre.Pthlh<sup>ff</sup>* mice from homozygous parents (*Dmp1Cre.Pthlh<sup>ff/hom</sup>*)  
29 have stronger bones, with 40% more trabecular bone mass and 30% greater femoral  
30 width than controls. At 12 days old, greater bone width was also found in male and female  
31 *Dmp1Cre.Pthlh<sup>ff/hom</sup>* mice, but not in gene-matched mice from heterozygous parents,  
32 suggesting a maternal influence before weaning. Milk PTHrP levels were normal, but  
33 decidua from mothers of *Dmp1Cre.Pthlh<sup>ff/hom</sup>* mice were smaller, with low PTHrP levels.  
34 Moreover, *Dmp1Cre.Pthlh<sup>ff/hom</sup>* embryonic bone was more mineralized and wider than  
35 control. We conclude that *Dmp1Cre* leads to gene recombination in decidua, and that  
36 decidual PTHrP influences decidual cell maturation and limits embryonic bone growth.  
37 This identifies a maternal-derived developmental origin of adult bone strength.

38

## 39 Introduction

40 Bone size and geometry are among the many factors determining bone strength (1).  
41 During skeletal development, bone grows in both the longitudinal and radial axes.  
42 Longitudinal growth is mediated by chondrocytes at the growth plates, where  
43 hypertrophic chondrocytes cease dividing, enlarge and eventually mineralize  
44 surrounding matrix (2). Simultaneously, expansion of bone diameter (termed “radial  
45 growth”) balances bone length and width. Although longitudinal growth has been studied  
46 widely, little is known about the signaling pathways orchestrating radial growth (3).

47 Parathyroid hormone-related protein (PTHrP, gene name: *Pthlh*) is produced by many  
48 tissues, and acts locally to maintain their physiological function (4). While global  
49 knockout of PTHrP is neonatal lethal and causes widespread skeletal defects including  
50 reduced bone length, due largely to PTHrP’s role in promoting chondrocyte maturation  
51 (5), heterozygous *Pthlh* deletion causes osteopenia in adult mice (6). Local PTHrP  
52 production by bone cells is also required for normal bone formation in adults during  
53 bone remodeling. This was established by studies in genetically altered mice; mice with  
54 *Pthlh* knockdown targeted to osteoblasts (*Col1(2.3kb)Cre.Pthlh<sup>f/f</sup>*) (6) or to osteocytes  
55 (*Dmp1(10kb)Cre*) (7) both exhibiting low bone formation and osteopenia in adulthood.

56 Here we report an effect of parental genotype on the bone structure of *Dmp1Cre.Pthlh<sup>f/f</sup>*  
57 mice. This study arose from an unexpected finding when in follow up of our previous  
58 study (7), we sought to assess the effect of *Dmp1Cre*-targeted knockdown of PTHrP in  
59 osteocyte in older mice. For this, we changed our breeding strategy from using  
60 heterozygous breeders to homozygous breeders to limit mouse wastage. As in previous  
61 studies from our laboratory (8, 9), we generated these mice using cousin-bred  
62 homozygous breeding pairs. To our surprise, adult male PTHrP-deficient mice generated  
63 from homozygous breeders (denoted *Dmp1Cre.Pthlh<sup>f/f(hom)</sup>*) exhibited an opposing  
64 phenotype to that of mice used in our previous work, generated from heterozygous  
65 breeders (denoted *Dmp1Cre.Pthlh<sup>f/f(het)</sup>*) (7): adult male *Dmp1Cre.Pthlh<sup>f/f(hom)</sup>* mice had  
66 high trabecular bone mass, and wide long bones, but normal body weight and normal  
67 bone length. Since this was a profound and reproducible phenotype, we sought to  
68 determine the parental source of the defect in bone structure.

69 Although we previously reported that *Dmp1Cre* can lead to gene recombination in the  
70 mammary gland (7), there was no alteration in milk PTHrP levels in *Dmp1Cre.Pthlh<sup>f/f(het)</sup>*  
71 dams. However, suckling male and female *Dmp1Cre.Pthlh<sup>f/f(hom)</sup>* mice both exhibited the  
72 wide bone phenotype. We traced the phenotype back to fetal development and found it  
73 was associated with low PTHrP levels in decidua basalis and impaired decidualization in  
74 mothers of *Dmp1Cre.Pthlh<sup>f/f(hom)</sup>* mice. This implies that PTHrP from the decidua limits  
75 bone radial growth in male and female mice, and that this has life-long effects on skeletal  
76 size in males, that override the effects of endogenous PTHrP deletion in osteocytes. This

77 has significant implications for bone development, sex-differences in bone growth, and  
78 for breeding strategies used with *Dmp1Cre*-targeted mouse models.

## 79 **Results**

80 Adult male *Dmp1Cre.Pthlh<sup>f/f(hom)</sup>* mice have a high trabecular bone mass set-point,  
81 reached before 14 weeks of age

82 In contrast to our previous experiments showing osteopenia in 12 week old  
83 *Dmp1Cre.Pthlh<sup>f/f(het)</sup>* mice (7), adult male *Dmp1Cre.Pthlh<sup>f/f(hom)</sup>* mice (i.e. mice bred from  
84 parents expressing *Dmp1Cre* and homozygous for the *Pthlh<sup>f/f</sup>* genotype, Figure 1A) had  
85 greater trabecular bone volume than age- and sex-matched controls (Figure 1B-G). At 14,  
86 16 and 26 weeks of age, male *Dmp1Cre.Pthlh<sup>f/f(hom)</sup>* mice had significantly higher  
87 trabecular bone volume (Figure 1B) and trabecular number (Figure 1C) than age- and  
88 sex-matched controls. This phenotype was stable; the proportional difference in  
89 trabecular bone volume and number between genotypes was the same at all three time  
90 points assessed: i.e. trabecular bone volume and number were at a constant ~140% and  
91 ~133% of sex-matched male controls. Trabecular thickness remained unchanged in  
92 *Dmp1Cre.Pthlh<sup>f/f(hom)</sup>* mice compared to sex- and age-matched controls at all time points  
93 (Figure 1D). Trabecular separation was ~18% lower than controls in male  
94 *Dmp1Cre.Pthlh<sup>f/f(hom)</sup>* mice, and was statistically significant only at the age of 14 weeks  
95 (Figure 1E).

96 When representative images were generated to show this difference in trabecular bone  
97 mass (Figure 1G), we noted that male *Dmp1Cre.Pthlh<sup>f/f(hom)</sup>* mice also had wider bones;  
98 when measured in the trabecular region of analysis, metaphyseal periosteal perimeter  
99 was significantly higher in male *Dmp1Cre.Pthlh<sup>f/f(hom)</sup>* mice at all three time points (Figure  
100 1F), confirming the wider bone phenotype of these mice. When *Dmp1Cre.Pthlh<sup>f/f(het)</sup>* mice  
101 were bred and aged to 16 and 26 weeks, no significant difference in trabecular structure  
102 or metaphyseal bone perimeter was detected at either age between *Dmp1Cre.Pthlh<sup>f/f(het)</sup>*  
103 mice and their controls (Figure 1 Supplement 1). These indicate that male  
104 *Dmp1Cre.Pthlh<sup>f/f(hom)</sup>* mice have a different phenotype to *Dmp1Cre.Pthlh<sup>f/f(het)</sup>* mice (7),  
105 although they have the same genotype, showing that parental genotype influences  
106 trabecular bone mass and bone radial growth.

107 The high trabecular bone mass in *Dmp1Cre.Pthlh<sup>f/f(hom)</sup>* mice was sex-specific. Female  
108 *Dmp1Cre.Pthlh<sup>f/f(hom)</sup>* mice showed no significant difference in trabecular bone volume,  
109 trabecular number, or metaphyseal periosteal perimeter compared to *Dmp1Cre<sup>(hom)</sup>*  
110 controls (Figure 1B-F). They did have lower trabecular separation at 16 weeks (Figure  
111 1E), implying a mild and transient elevation in trabecular bone mass.

**Figure 1**

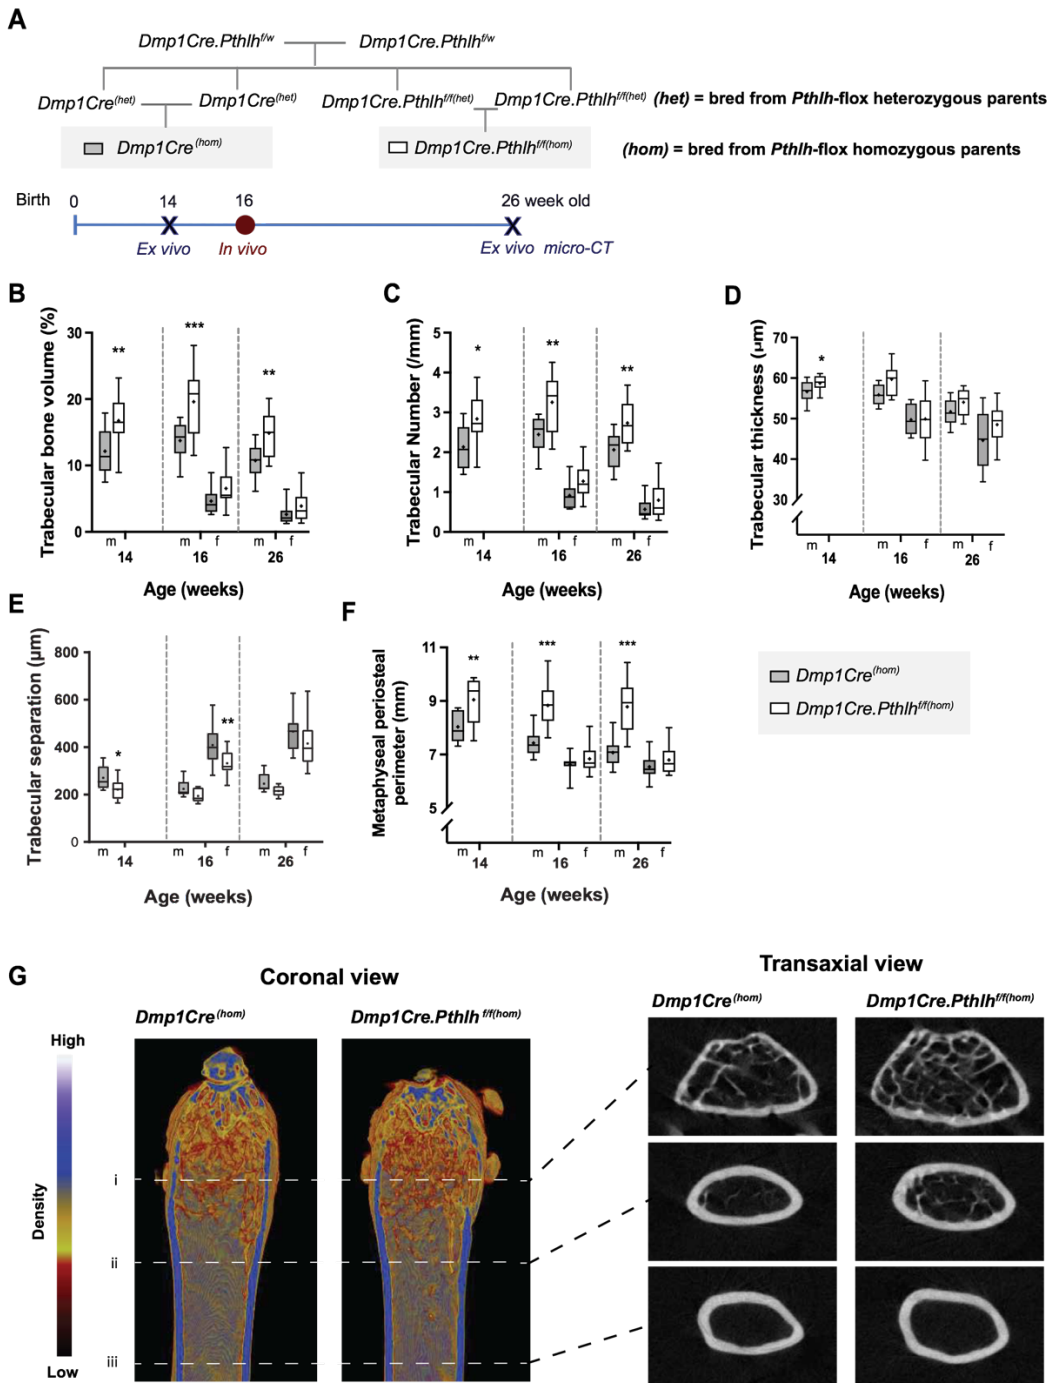

**Figure 1: Breeding strategy and high trabecular bone mass in 14, 16 and 26 week old male *Dmp1Cre.Pthlh<sup>ff/hom</sup>* mice.** **A:** Schematic showing breeding strategy and data collection points. **B-F:** Trabecular structure of *Dmp1Cre.Pthlh<sup>ff/hom</sup>* distal femoral primary spongiosa analysed by micro-CT in male mice (m) at 14, 16 and 26 weeks of age, and in female mice (f) at 16 and 26 weeks of age. Trabecular bone volume, trabecular number, trabecular thickness, trabecular separation, and metaphyseal periosteal perimeter are shown as mean (dot), interquartile range (box), median (line) and range; n=9-10/group. \*p<0.05, \*\*p<0.01, \*\*\*p<0.001 compared to sex- and age-matched *Dmp1Cre<sup>hom</sup>* by two-way ANOVA (16 and 26 weeks old) and Student's t-test (14 weeks old). **G:** Representative micro-CT images of trabecular bone in the distal femoral primary spongiosa of 26-week old male mice, showing density (scale above images), and raw cross-sectional images of the metaphysis (i), metaphyseal diaphysis (ii) and diaphysis (iii), showing a difference in bone size, and projection of trabecular bone into the lower metaphysis in *Dmp1Cre.Pthlh<sup>ff/hom</sup>* samples.

112

113

114

115 To confirm this trabecular phenotype in homozygous-bred mice, trabecular bone  
116 structure was studied at a second anatomical region, 5<sup>th</sup> lumbar (L5) vertebrae. Similar  
117 to long bones, vertebrae of 14 week old male *Dmp1Cre.Pthlh<sup>ff(hom)</sup>* had higher trabecular  
118 bone volume and trabecular number than controls (Table 1). Trabecular separation was  
119 lower in male *Dmp1Cre.Pthlh<sup>ff(hom)</sup>* mice than controls, and there was no significant  
120 difference in trabecular thickness (Table 1). This confirmed the trabecular phenotype  
121 was not restricted to a single anatomical location.

122 Although trabecular bone mass was greater in male 14 week old *Dmp1Cre.Pthlh<sup>ff(hom)</sup>*  
123 mice, dynamic histomorphometry revealed no difference in any bone formation or  
124 resorption parameters compared to controls (Table 2). In addition, no significant  
125 difference was detected in serum levels of the bone formation or resorption markers,  
126 P1NP and CTX1, of 14 week old male *Dmp1Cre.Pthlh<sup>ff(hom)</sup>* mice compared to controls  
127 (Table 2). This, and the similar proportion of elevation in trabecular bone mass at 14, 16  
128 and 26 weeks suggest that the high trabecular bone mass arose before 14 weeks of age,  
129 and has reached a greater adult set-point for “peak bone mass” than controls.

130 Adult male *Dmp1Cre.Pthlh<sup>ff(hom)</sup>* mice have a wide bone phenotype, reached before 14  
131 weeks of age, that leads to greater bone strength

132 Since the metaphyseal bone width was greater in adult male *Dmp1Cre.Pthlh<sup>ff(hom)</sup>* mice  
133 than controls, we analysed femoral cortical bone structure in more detail (Figure 2A).  
134 Although femoral length was not different between *Dmp1Cre.Pthlh<sup>ff(hom)</sup>* mice and  
135 *Dmp1Cre<sup>(hom)</sup>* controls (Figure 2B), adult male *Dmp1Cre.Pthlh<sup>ff(hom)</sup>* femora were wider in  
136 both anteroposterior and mediolateral dimensions compared to controls at 14, 16 and 26  
137 weeks (Figure 2C,D). The greater femoral width in male *Dmp1Cre.Pthlh<sup>ff(hom)</sup>* mice was in  
138 proportion: the ratio of anteroposterior to mediolateral widths was not different in these  
139 mice compared to controls at any time point (data not shown). Adult male  
140 *Dmp1Cre.Pthlh<sup>ff(hom)</sup>* mice exhibited greater marrow and cortical area, and greater  
141 periosteal and endocortical perimeters, compared to age- and sex-matched controls  
142 (Figure 2E-I). Although cortical diameter was greater, this was balanced on the  
143 endocortical and periosteal surfaces, as there was no significant difference in cortical  
144 thickness (Figure 2G). As in trabecular bone, the greater cortical bone width phenotype  
145 was stable, showing a similar proportional difference compared to controls at all three  
146 time points.

147 Female *Dmp1Cre.Pthlh<sup>ff(hom)</sup>* mice showed no significant difference in cortical bone size  
148 or shape compared to age-matched *Dmp1Cre<sup>(hom)</sup>* mice at 16 or 26 weeks of age (Figure  
149 2).

150 Heterozygous-bred *Dmp1Cre.Pthlh<sup>ff(het)</sup>* mice at 16 and 26 weeks of age did not exhibit  
151 any significant difference in anteroposterior or mediolateral femoral width compared to

**Figure 2**

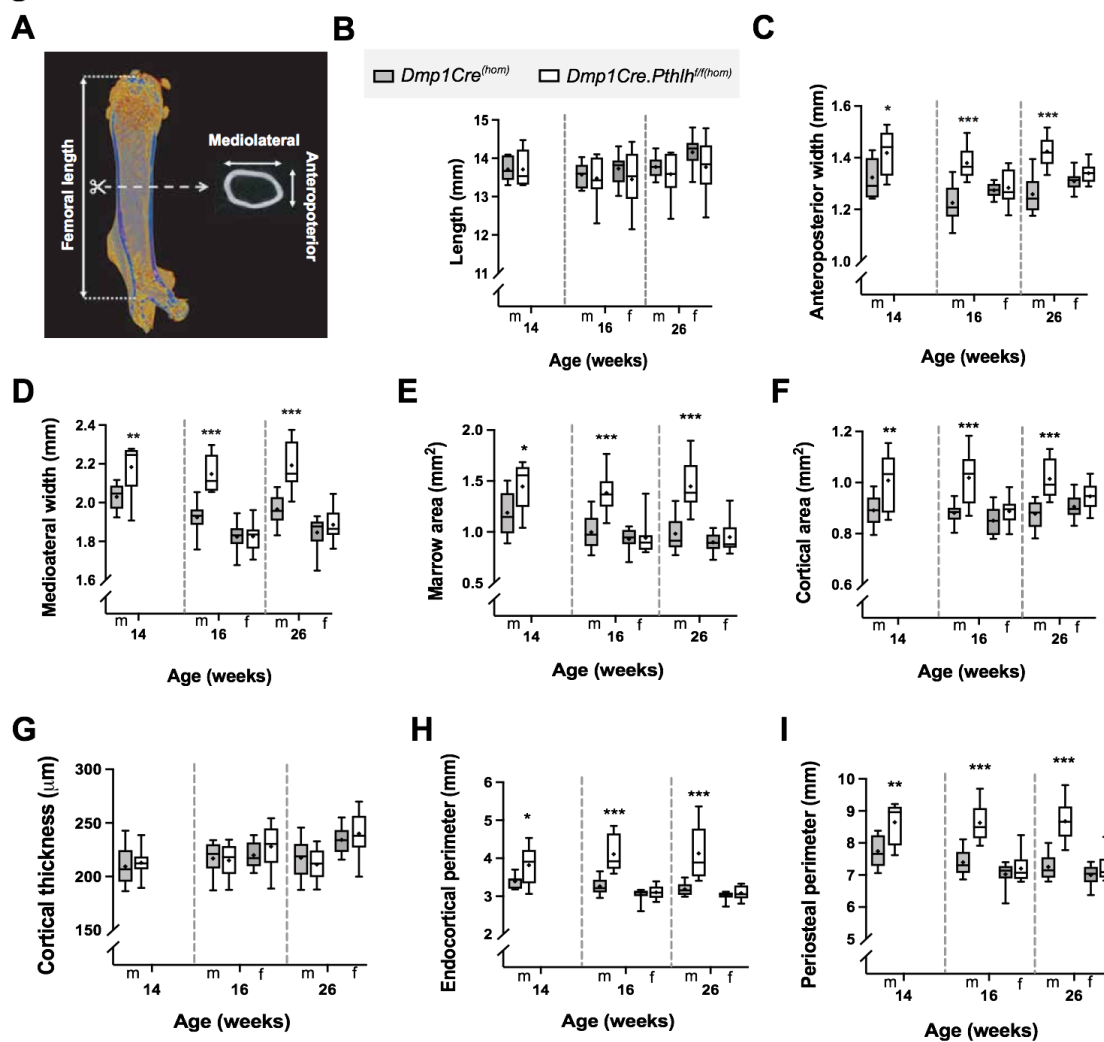

152

153

154

155

**Figure 2: Wide bone phenotype of adult male *Dmp1Cre.Pthlh<sup>f(hom)</sup>* mice. A:** Schematic showing measurement regions. Bone length (B) and cortical dimensions of male (m) *Dmp1Cre.Pthlh<sup>f(hom)</sup>* and *Dmp1Cre<sup>(hom)</sup>* mice at 14, 16 and 26 weeks of age, and female mice (f) at 16 and 26 weeks of age. Anteroposterior (C) and mediolateral (D) width, measured by micro-CT at the midshaft. E-I Femoral marrow area (E), cortical bone area (F), thickness (G), and both endocortical (H) and periosteal (I) perimeter were analysed in cortical ROI by micro-CT. Data are shown as mean (dot), interquartile range (box), median (line) and range; n=9-10/group. \*p<0.05, \*\*p<0.01, \*\*\*p<0.001 compared to sex- and age-matched *Dmp1Cre<sup>(hom)</sup>* by two-way ANOVA (16 and 26 weeks old) and Student's t-test (14 weeks old).

156 *Dmp1Cre<sup>(het)</sup>* controls (Figure 2 Supplement 1B,C), nor in marrow area, or periosteal  
157 circumference (Figure 2 Supplement 1E,I). At 16 weeks, male mice did exhibit a small and  
158 significant transient elevation in cortical area and endocortical perimeter; this was no  
159 longer detected at 26 weeks (Figure 2 Supplement 1F,H).

160 Since greater bone width is associated with greater bone strength, we carried out three-  
161 point bending tests. Femora from 26 week old male *Dmp1Cre.Pthlh<sup>ff(hom)</sup>* mice could  
162 withstand higher loads than age-matched *Dmp1Cre<sup>(hom)</sup>* controls, reaching a higher  
163 ultimate force (Figure 3A,B) and failure force (Table 3) before breaking. There was no  
164 significant difference in ultimate displacement between *Dmp1Cre.Pthlh<sup>ff(hom)</sup>* and control  
165 femora (Figure 3C). When these measurements were corrected for bone size, both 14 and  
166 26 week old male *Dmp1Cre.Pthlh<sup>ff(hom)</sup>* femora showed lower ultimate stress and yield  
167 stress, compared to controls (Figure 3D-F). 14 week old male *Dmp1Cre.Pthlh<sup>ff(hom)</sup>*  
168 femora had higher ultimate and failure strain than controls (Table 3). 26 week old male  
169 *Dmp1Cre.Pthlh<sup>ff(hom)</sup>* femora had lower failure stress (Figure 3G), and reduced toughness  
170 and elastic modulus (Table 3) compared to sex- and age-matched controls. This indicates  
171 that the greater width of the bones increased bone strength by lowering the stress  
172 experienced by the material under three point bending conditions.

173 While ultimate force, failure force, ultimate stress, yield stress, failure stress and  
174 toughness were modified in the male mice, these parameters were not changed in females  
175 (Figure 3 and Table 3), consistent with their loss of the greater bone width with ageing.  
176 Surprisingly, femora from female *Dmp1Cre.Pthlh<sup>ff(hom)</sup>* mice achieved a greater yield force  
177 and displacement compared to age- and sex-matched controls (Table 3), suggesting a  
178 higher elastic deformation. When corrected for bone size, 26 week old female  
179 *Dmp1Cre.Pthlh<sup>ff(hom)</sup>* femora had higher yield strain and lower elastic modulus (Table 3),  
180 suggesting a more flexible material than controls.

181 Femora from 26 week old heterozygous-bred *Dmp1Cre.Pthlh<sup>ff(het)</sup>* mice did not show any  
182 significant difference in mechanical properties compared to *Dmp1Cre<sup>(het)</sup>* controls (Figure  
183 3 Supplement 1).

**Figure 3**

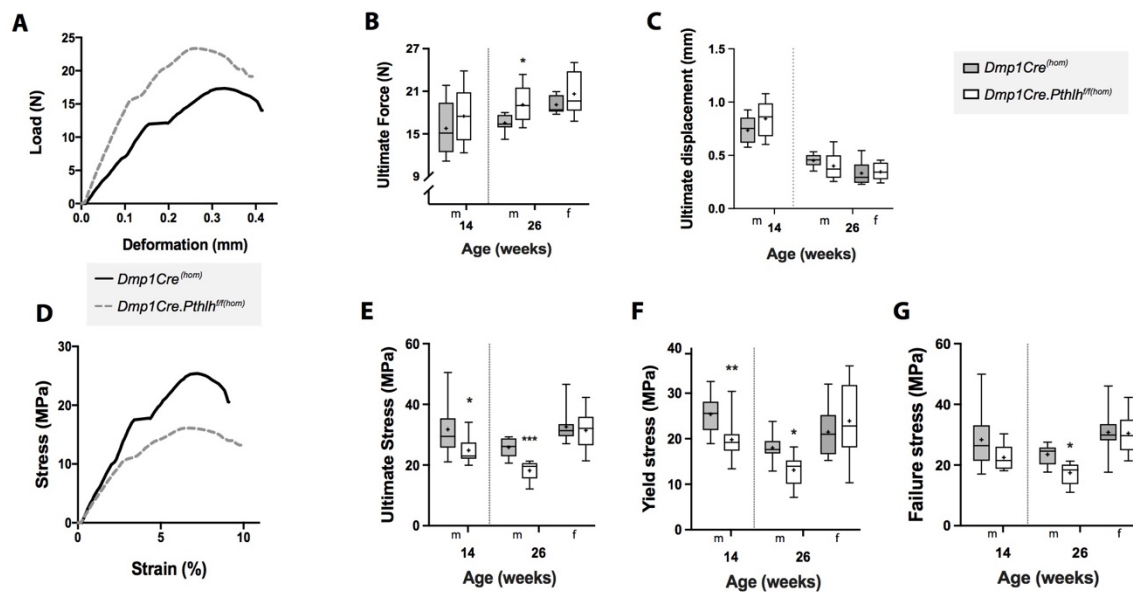

184

**Figure 3: Greater ultimate strength in 26-week old and less stress in 14 and 26-week old male *Dmp1Cre.Pthlh<sup>f/fl(hom)</sup>* femora measured by three-point bending tests.** **A:** Representative load-deformation curves of 26-week old male *Dmp1Cre.Pthlh<sup>f/fl(hom)</sup>* and *Dmp1Cre<sup>fl/om</sup>* bones. Greater ultimate force (**B**) and normal ultimate deformation (**C**) in femora from 26-week old males; no change in 14 week old males and 26 week old females. **D:** Representative stress-strain curves of 26-week old male *Dmp1Cre.Pthlh<sup>f/fl(hom)</sup>* and *Dmp1Cre<sup>fl/om</sup>* bones, after correction in each sample based on anteroposterior and mediolateral dimensions (shown in Figure 2). Also shown are ultimate stress (**E**), yield stress (**F**), and failure stress (**G**). Data shown as mean (dot), interquartile range (box), median (line) and range, n=9-10/group. \*p<0.05, \*\*p<0.01 and \*\*\*p<0.001 compared to age- and sex-matched controls by two-way ANOVA (16 and 26 weeks old) and Student's t-test (14 weeks old).

185

186 The wide bone phenotype is present at 12 days of age in male and female  
 187 *Dmp1Cre.Pthlh<sup>f/fl(hom)</sup>* mice

188 Since we previously observed recombination of PTHrP in the mammary gland in  
 189 *Dmp1Cre.Pthlh<sup>f/fl(het)</sup>* mice (7), and deletion of maternal mammary PTHrP is reported to  
 190 lead to greater bone mass in progeny at 12 days of age (10), we sought to determine  
 191 whether bone mass was modified in 12 day old *Dmp1Cre.Pthlh<sup>f/fl(hom)</sup>* mice, and whether  
 192 maternal milk PTHrP content was reduced. 12 day old mice were assessed from both  
 193 heterozygous (*Dmp1Cre.Pthlh<sup>f/fl(het)</sup>*) (Figure 4A) and homozygous (*Dmp1Cre.Pthlh<sup>f/fl(hom)</sup>*)  
 194 (Figure 1A) breeding strategies.



## Figure 4

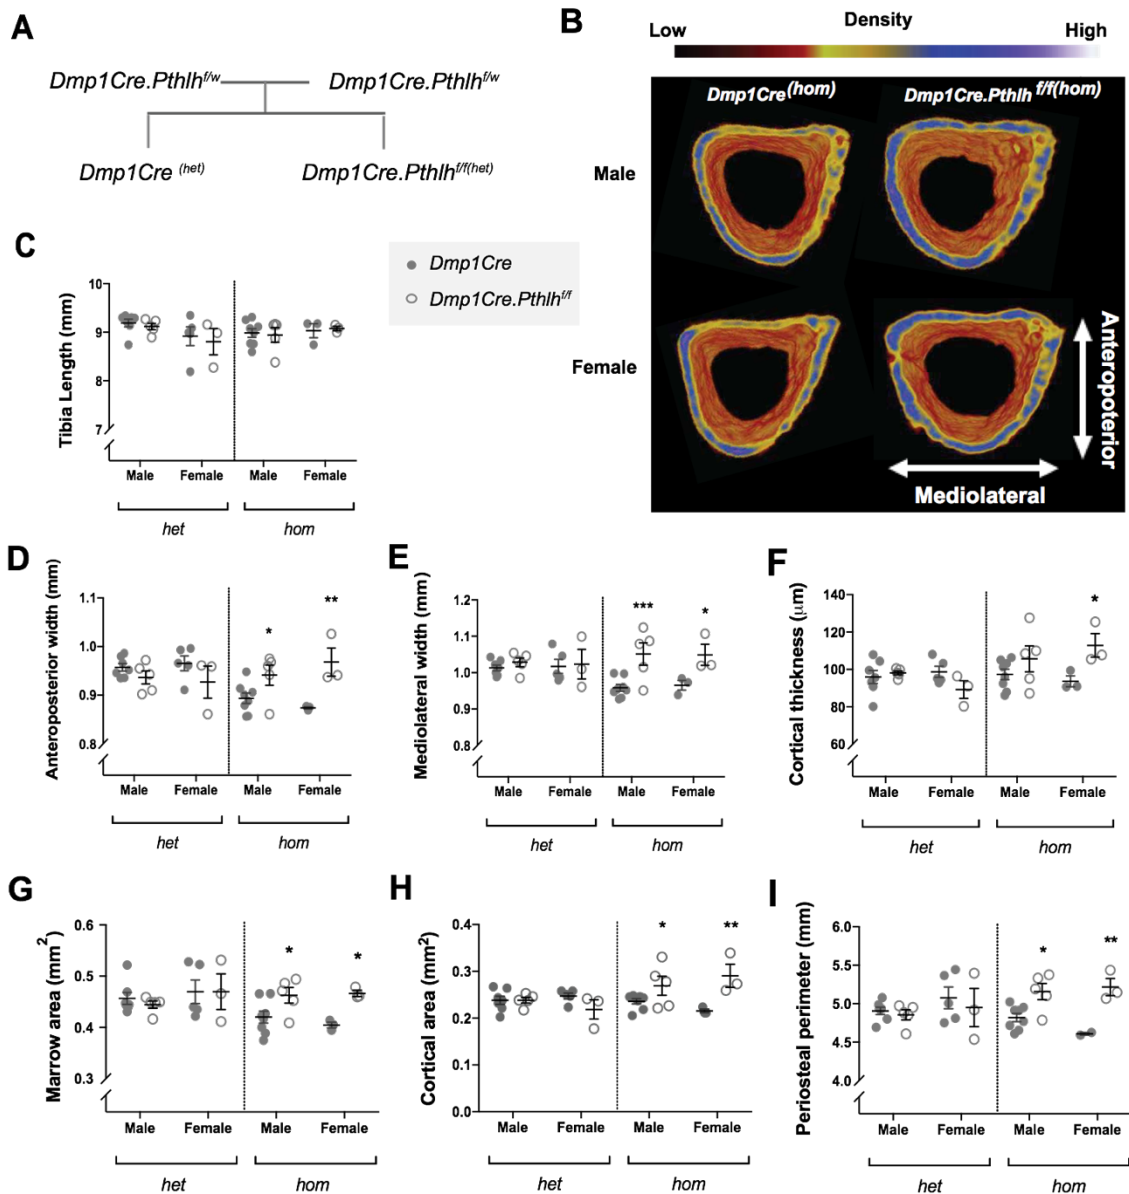

195

196

197

**Figure 4: Wide bone phenotype of 12 day old male and female *Dmp1Cre.Pthlh<sup>ff(hom)</sup>* mice.** **A:** Schematic diagram showing heterozygous breeding strategy used for this experiment. **B:** Representative micro-CT images of cortical bone of 12 day-old *Dmp1Cre.Pthlh<sup>ff(hom)</sup>* tibiae. **C-I:** Tibial cortical structure of 12 day old *Dmp1Cre.Pthlh<sup>ff</sup>* mice from heterozygous (het) and homozygous (hom) breeders compared to their respective *Dmp1Cre* controls. Shown are tibial length (**C**), anteroposterior (**D**) and mediolateral (**E**) width, cortical thickness (**F**), marrow area (**G**), cortical area (**H**) and periosteal perimeter (**I**). Data is shown as mean ± SEM with individual data points, \**p*<0.01, \*\**p*<0.01, \*\*\**p*<0.001 compared to age- and sex-matched controls by two-way ANOVA.

198 While no significant differences in cortical dimensions were detected in tibiae from male  
199 or female *Dmp1Cre.Pthlh<sup>f/f(het)</sup>* mice (from heterozygous breeders), *Dmp1Cre.Pthlh<sup>f/f(hom)</sup>*  
200 mice (from homozygous breeders) exhibited greater tibial width at 12 days of age (Figure  
201 4B-I) with no difference in tibial length (Figure 4C). Both male and female  
202 *Dmp1Cre.Pthlh<sup>f/f(hom)</sup>* mice had significantly greater tibial width in the anteroposterior  
203 and mediolateral direction, compared to sex-matched *Dmp1Cre<sup>(hom)</sup>* (Figure 4B,D,E). Male  
204 and female *Dmp1Cre.Pthlh<sup>f/f(hom)</sup>* mice also showed greater tibial marrow area (Figure  
205 4G), cortical area (Figure 4H), and periosteal perimeter (Figure 4I) compared to sex-  
206 matched cousin-bred *Dmp1Cre<sup>(hom)</sup>* controls. Female *Dmp1Cre.Pthlh<sup>f/f(hom)</sup>* also had  
207 greater cortical thickness than female *Dmp1Cre<sup>(hom)</sup>* controls (Figure 2F). No significant  
208 difference was observed in trabecular structure between *Dmp1Cre.Pthlh<sup>f/f(hom)</sup>* mice and  
209 their *Dmp1Cre<sup>(hom)</sup>* sex-matched controls (Table 4), suggesting that this aspect of the  
210 phenotype was secondary to the increase in bone width.

211 Although PTHrP gene recombination was detected in mammary tissue from  
212 *Dmp1Cre.Pthlh<sup>f/f(het)</sup>* mice (7), milk PTHrP levels, measured either by radioimmunoassay  
213 or bioassay, and milk protein levels were not significantly altered in *Dmp1Cre.Pthlh<sup>f/f(het)</sup>*  
214 mice compared to controls (Table 5).

#### 215 The *Dmp1Cre.Pthlh<sup>f/f(hom)</sup>* wide-bone phenotype exists *in utero*

216 Since no change in milk PTHrP could explain the phenotype at 12 days of age, we  
217 determined whether the phenotype existed *in utero* by assessing embryonic bone size.  
218 Consistent with our observations at 12 days, embryonic *Dmp1Cre.Pthlh<sup>f/f(hom)</sup>* femora  
219 (E18.5) were wider in both anteroposterior and mediolateral dimensions, and exhibited  
220 a higher moment of inertia compared to *Dmp1Cre<sup>(hom)</sup>* controls (Figure 5A, D-I). Greater  
221 bone area and tissue area of *Dmp1Cre.Pthlh<sup>f/f(hom)</sup>* embryos confirmed that their femora  
222 are wider than controls (Figure 5 Supplement 1). This greater bone width was observed  
223 along the full length of the bone, including both metaphysis and the diaphysis.

224 The length of the mineralized portion of *Dmp1Cre.Pthlh<sup>f/f(hom)</sup>* femora, measured by  
225 micro-CT, was also greater than *Dmp1Cre<sup>(hom)</sup>* controls (Figure 5B). Micro-computed  
226 tomography cannot detect the full length of the bone at this age, as the cartilage ends are  
227 not yet mineralized prior to birth. Total femoral length measured in Alizarin Red/Alcian  
228 Blue stained samples showed no difference between *Dmp1Cre.Pthlh<sup>f/f(hom)</sup>* and  
229 *Dmp1Cre<sup>(hom)</sup>* controls (Figure 5C), indicating that *Dmp1Cre.Pthlh<sup>f/f(hom)</sup>* embryos have  
230 normal bone length, but accelerated mineralization *in utero*.

231 Heterozygous-bred *Dmp1Cre.Pthlh<sup>f/f(het)</sup>* embryos did not show any significant difference  
232 in the mineralized length compared to *Dmp1Cre<sup>(het)</sup>* controls (Figure 5 Supplement 2A,B),  
233 nor in the bone width or structure (Figure 5 Supplement 2C-K).

## Figure 5

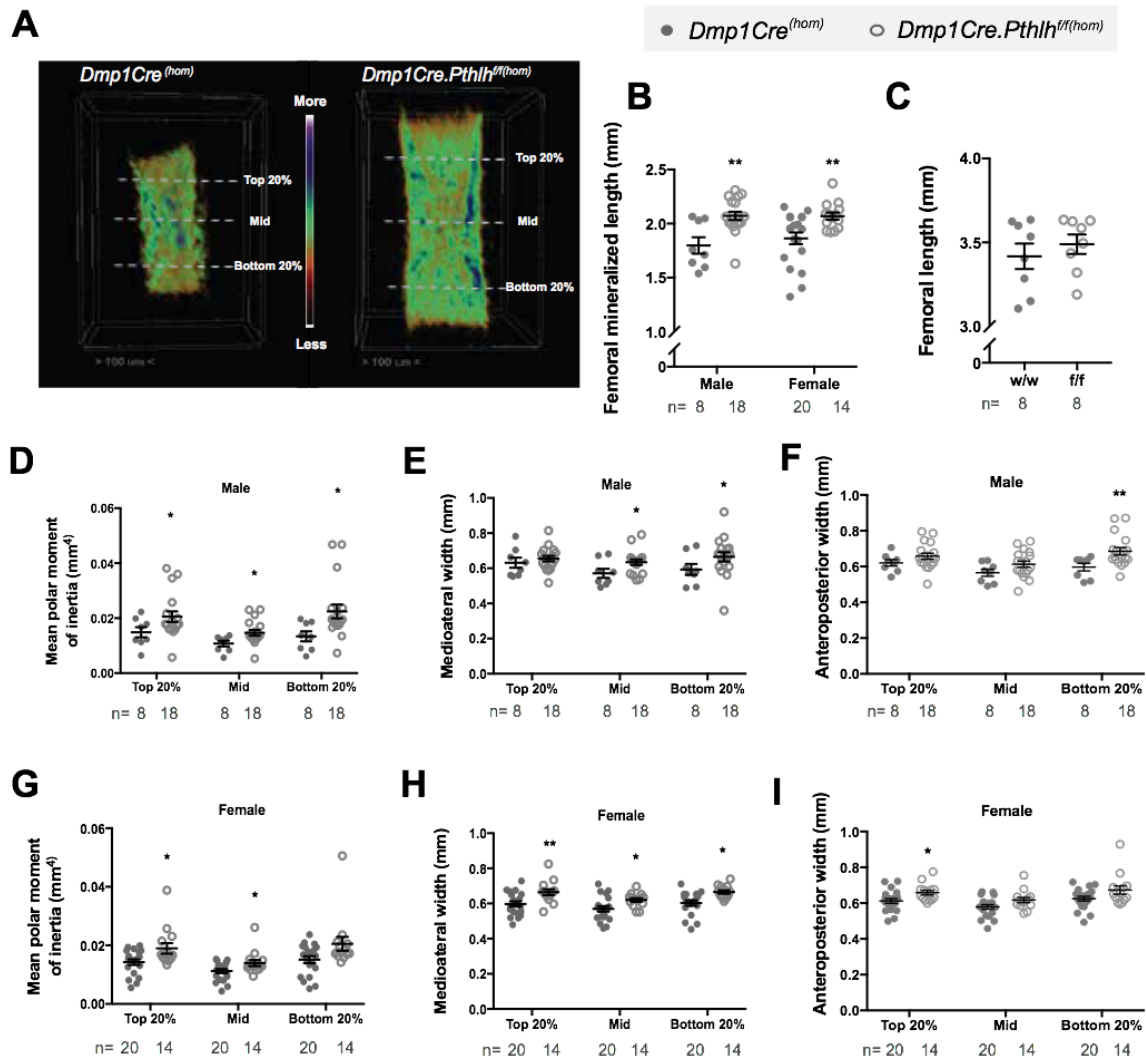

234

235

236

**Figure 5: Accelerated bone development of E18.5 *Dmp1Cre.Pthlh*<sup>f/f(hom)</sup> femora.** **A)** representative images of *Dmp1Cre.Pthlh*<sup>f/f(hom)</sup> and *Dmp1Cre*<sup>(hom)</sup> femora at E18.5, showing bone mineral density. **B)** Femoral mineralized length, **C)** total femoral length, **D-I):** Mean polar moment of inertia (**D, G**), mediolateral (**E, H**), and anteroposterior widths (**F, I**) of *Dmp1Cre.Pthlh*<sup>f/f(hom)</sup> and *Dmp1Cre*<sup>(hom)</sup> at three different locations shown in panel A: at 20% of the mineralized length distal to the proximal end of the mineralized region (Top 20%), at the midshaft (Mid), and at 20% of the mineralized length proximal to the distal end of the mineralized region (Bottom 20%). Data is shown as mean ± SEM with individual data points, \**p*<0.05, \*\**p*<0.01, and \*\*\**p*<0.001 compared to controls by two-way ANOVA (B-H).

## 237 Low PTHrP levels and modified cell morphology in *Dmp1Cre.Pthlh<sup>ff</sup>* decidua

238 Since we observed increased bone width *in utero* in *Dmp1Cre.Pthlh<sup>ff(hom)</sup>* mice, and PTHrP  
239 is produced by uterus and decidua (11, 12), we sought to determine whether PTHrP  
240 expression is modified in placenta or decidua from *Dmp1Cre.Pthlh<sup>ff(hom)</sup>* mice. Consistent  
241 with a lack of change in overall bone growth, there were no significant differences in body  
242 weight, placental weight, or body to placental weight ratios between *Dmp1Cre.Pthlh<sup>ff(hom)</sup>*  
243 embryos and *Dmp1Cre<sup>(hom)</sup>* controls (Figure 6A-C). No alteration in these parameters  
244 were observed in *Dmp1Cre.Pthlh<sup>ff(het)</sup>* embryos and placenta compared to littermate  
245 *Dmp1Cre.Pthlh<sup>w/w(het)</sup>* (Figure 6 Supplement 1A-D). This suggests the increased bone  
246 width of *Dmp1Cre.Pthlh<sup>ff(hom)</sup>* embryos is not caused by changes in placental efficiency.

247 PTHrP staining of decidua and placenta showed positive staining for PTHrP in both the  
248 decidua and the spongiotrophoblast layer (junctional zone) of the placenta (Figure 6D).  
249 No PTHrP was detected in the placental labyrinth zone. PTHrP staining in decidua from  
250 mothers of *Dmp1Cre.Pthlh<sup>ff(hom)</sup>* mice was not as strong as that observed in decidua from  
251 mothers of *Dmp1Cre<sup>(hom)</sup>* mice (Figure 6D,E). Quantification revealed a significant  
252 reduction in PTHrP staining at all intensities in decidua from mothers of  
253 *Dmp1Cre.Pthlh<sup>ff(hom)</sup>* mice, but no change in PTHrP staining frequency in the  
254 spongiotrophoblast zone of the adjacent placenta (Figure 6F). IgG isotype control had  
255 minimal intensity in both regions. No alteration in PTHrP staining frequency was  
256 observed in decidua adjacent to *Dmp1Cre.Pthlh<sup>ff(het)</sup>* placenta compared to littermate  
257 *Dmp1Cre.Pthlh<sup>w/w(het)</sup>* (Figure 6 Supplement 1E). This suggests off-target effects of  
258 *Dmp1Cre* have led to reduced PTHrP protein production by decidual cells.

259 We also examined the morphology of decidua from samples adjacent to  
260 *Dmp1Cre.Pthlh<sup>ff(hom)</sup>* placenta. The decidual cells from mothers of *Dmp1Cre.Pthlh<sup>ff(hom)</sup>*  
261 embryos appeared more compact than in *Dmp1Cre<sup>(hom)</sup>* decidua, suggesting impaired  
262 decidual cell maturation (Figure 6G,H). Total decidual area was significantly less in  
263 samples from mothers of *Dmp1Cre.Pthlh<sup>ff(hom)</sup>* embryos than *Dmp1Cre<sup>(hom)</sup>*, but the area  
264 of the spongiotrophoblast zone was not significantly modified (Figure 6I). No change in  
265 decidual size was detected in decidua adjacent to *Dmp1Cre.Pthlh<sup>ff(het)</sup>* placenta compared  
266 to littermate *Dmp1Cre.Pthlh<sup>w/w(het)</sup>* controls (Figure 6 Supplement 1F,G). This suggests  
267 PTHrP may act locally within the decidua to promote decidual cell maturation, and this  
268 may cause increased bone width growth of *Dmp1Cre.Pthlh<sup>ff(hom)</sup>* mice *in utero*.

**Figure 6**

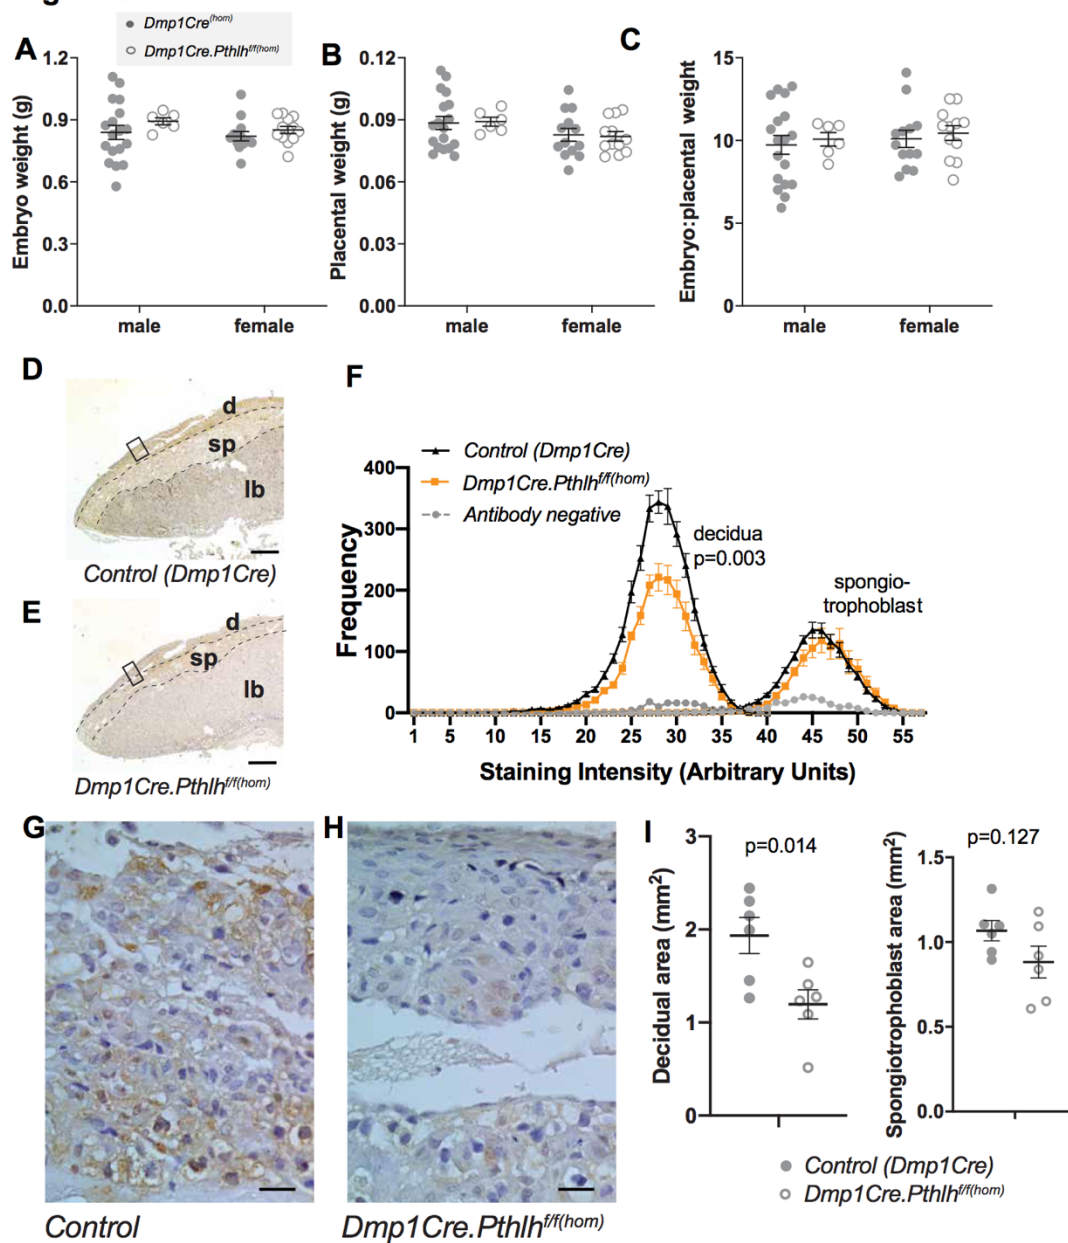

269

270

**Figure 6: Decreased decidual PTHrP and impaired decidualization of *Dmp1Cre.Pthlh<sup>ff</sup>* mice at E17.5.** Embryo weight (**A**), placental weight (**B**) and embryo to placental weight ratio (**C**) of *Dmp1Cre.Pthlh<sup>ff(hom)</sup>* and *Dmp1Cre<sup>(hom)</sup>*. (**D-H**) Immunostaining for PTHrP in samples of placenta and decidua from *Dmp1Cre.Pthlh<sup>ff(hom)</sup>* and *Dmp1Cre<sup>(hom)</sup>* embryos at E17.5; IgG control staining was measured in images of both zones. Decidua (d), spongiotrophoblast (sp) and labyrinth (lb) zones are shown in low power images (D,E). Scale bar = 1 mm. Frequency of PTHrP stained objects segregated by staining intensity in the spongiotrophoblast layer and decidua from *Dmp1Cre.Pthlh<sup>ff(hom)</sup>* and *Dmp1Cre<sup>(hom)</sup>* embryos. (**F,G**) High power images of decidua. Scale bar = 20 micron. (**I**) Quantitation of total decidual area and spongiotrophoblast area; mean  $\pm$  SEM with individual data points, \* $p < 0.05$ , \*\* $p < 0.01$  compared to controls by one-way ANOVA.

## 271 Discussion

272 This study identifies that off-target effects of *Dmp1Cre*-mediated recombination led to  
273 reduced decidual PTHrP. Reduced PTHrP level in the decidua is associated with increased  
274 embryonic bone radial growth and mineralization *in utero*. This wide bone phenotype is  
275 observed in both male and females at 12 days of age, and is sustained until at least 6  
276 months of age in male, but not female, skeletons (Figure 7). These effects of reduced  
277 decidual PTHrP on bone size, trabecular bone mass, and bone strength dominates over  
278 the previously reported effects of reducing endogenous PTHrP in osteocytes, which  
279 suppressed bone formation and reduced trabecular bone mass of young adult mice (7).  
280 This suggests that locally produced PTHrP is essential for normal decidualization, and  
281 through these actions influences embryonic bone growth. This indicates an additional  
282 role for PTHrP in maternal physiology.

**Figure 7**

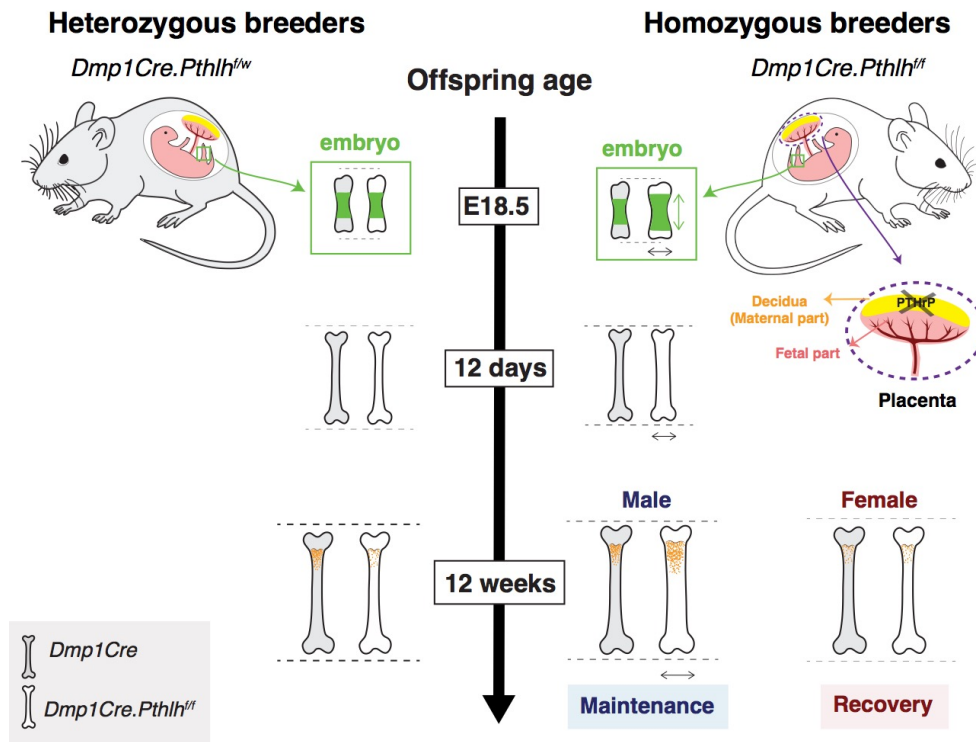

283

284

285

**Figure 7: Decidual PTHrP determines bone width in progeny.** Mice from breeders heterozygous for PTHrP (*Dmp1Cre.Pthlh<sup>fw</sup>* breeders) had normal bone size (length and width) compared to their sex- and age-matched controls, but lower adult trabecular bone mass. Decidual PTHrP may limit fetal skeletal development and radial growth, independent of longitudinal growth. Mothers of *Dmp1Cre.Pthlh<sup>ff(hom)</sup>* mice (which are *Dmp1Cre.Pthlh<sup>ff(het)</sup>*) had lower levels of decidual PTHrP, leading to wider long bones in *Dmp1Cre.Pthlh<sup>ff(hom)</sup>* progeny. This phenotype was observed not only in embryos and neonatal mice, but also in adult male mice. Adult male mice also showed high trabecular bone mass compared to their sex-matched *Dmp1Cre* controls.

286 Our data contrasts the role of maternal-derived PTHrP with endogenous osteocytic  
287 PTHrP. *Dmp1Cre.Pthlh<sup>f/f(hom)</sup>* mice exhibited wider long bones during late embryogenesis,  
288 at 12 days of age in both males and females, and during adulthood in males, leading to  
289 greater bone strength at 26 weeks of age. This phenotype was not observed in  
290 *Dmp1Cre.Pthlh<sup>f/f(het)</sup>* mice at any time point studied. In addition to their increased bone  
291 width, adult male *Dmp1Cre.Pthlh<sup>f/f(hom)</sup>* mice had high trabecular bone mass, in contrast  
292 to the osteopenia observed in *Dmp1Cre.Pthlh<sup>f/f(het)</sup>* mice at 12 weeks of age (7). The  
293 requirement for decidual PTHrP therefore dominates the requirement for endogenous  
294 osteocytic PTHrP. The influence of decidual PTHrP in restricting bone width also  
295 contrasts with the role of endogenous PTHrP from the embryo-derived portion of the  
296 placenta, which promotes placental calcium transport and skeletal development, as  
297 indicated by reduced bone length in *Pthlh* null embryos (5).

298 The role of decidual PTHrP has not previously been investigated. PTHrP is produced  
299 within the decidua, myometrium, amnion, and chorion, where it dilates the uterine and  
300 placental vasculature and inhibits myometrial contractions (13-15). Here we showed  
301 PTHrP is expressed by decidua and spongiotrophoblast layer (or junctional zone),  
302 whereas labyrinth zone of placenta had undetectable levels of PTHrP. Decidua from  
303 mothers of *Dmp1Cre.Pthlh<sup>f/f(hom)</sup>* mice had significantly lower PTHrP staining, but there  
304 was no change in placental PTHrP staining, supporting a maternal origin of the defect.  
305 Decidua from mothers of *Dmp1Cre.Pthlh<sup>f/f(hom)</sup>* mice were also smaller in size and decidual  
306 cell morphology was modified. The smaller decidua and reduced size of decidual cells in  
307 mothers of *Dmp1Cre.Pthlh<sup>f/f(hom)</sup>* mice was a surprising finding in this study. This may  
308 reflect reduced decidual cell differentiation, since decidual cells are enlarged during  
309 decidualization (16, 17). Alternatively, it may reflect decidual cell atrophy in mothers of  
310 *Dmp1Cre.Pthlh<sup>f/f(hom)</sup>* mice. Since previous studies reported that PTHrP repressed  
311 decidualization of human uterine fibroblast cells (18), that intrauterine injection of  
312 PTH/PTHrP receptor antagonist from day 6 to 13 post coitum (after induction of decidua)  
313 increased decidualisation in rats (19), and *Pthlh* mRNA levels are downregulated during  
314 decidualization in primary endometrial stromal cells (20), we suggest the reduced size of  
315 decidual cells at day E17.5 may reflect early commencement of atrophy. How this drives  
316 the increased radial growth and mineralization in the *Dmp1Cre.Pthlh<sup>f/f(hom)</sup>* embryo  
317 remains to be established.

318 It is very surprising that *Dmp1-Cre* targeted recombination had an influence on decidua.  
319 Although the *Dmp1-Cre* mouse is widely used as an osteocyte and late-osteoblast  
320 conditional knockout mouse, multiple off-target tissues have been reported. These  
321 include our previous report of recombination in the mammary gland (7). We and others  
322 have shown recombination in skeletal muscle and certain brain cells (7), and reporter  
323 genes have also shown *Dmp1-Cre* expression in preosteoblasts, a subset of bone marrow  
324 stromal cells, and gastrointestinal mesenchymal stromal cells (21). To date, there is no  
325 report that *Dmp1-Cre* targets decidua, which is a transient uterine tissue. We previously  
326 tested non-pregnant uterus, and found that *Dmp1-Cre* recombination did not occur (7).

327 The expression of *Dmp1-Cre* in decidua has major implications for the design and  
328 reporting of experiments utilizing *Dmp1Cre* for gene deletion. However, this clearly  
329 depends on the function of the targeted gene. For example, although gp130, and its  
330 inhibitor protein SOCS3, are expressed in murine decidua (22, 23), homozygous-bred  
331 *Dmp1Cre.gp130<sup>ff</sup>* mice (8) and *Dmp1Cre.Socs3<sup>ff</sup>* mice (9) showed phenotypes similar to  
332 that of heterozygous-bred mice of the same genotype (9, 24).

333 Although decidua and placenta provide nutrition to promote embryonic and placental  
334 weight gain *in utero* (25), and these effects influence adult health, including bone mass  
335 (26), there was no change in total embryo or placental weight in *Dmp1Cre.Pthlh<sup>ff(hom)</sup>*  
336 embryos. This suggests maternal contributors to general embryonic nutrition, such as  
337 uteroplacental blood flow and nutrient transport across the placenta controlled by (for  
338 example) growth hormone, IGF-I, insulin, and glucocorticoids, are unlikely to contribute  
339 to the phenotype we observe. The influence of decidual PTHrP on growth appears to be  
340 specific to the skeleton. The alteration in the morphological features of decidua might be  
341 associated with changes in its function, resulting in changes in skeletal development.  
342 Whether decidual PTHrP, like embryonic placental PTHrP regulates placental calcium  
343 transport or fetal PTH levels (27, 28) or other local regulators of bone development,  
344 which are known to regulate fetal bone development (29), or it acts systematically to  
345 regulate bone radial growth remains unknown.

346 The increased mineralization length and greater bone width of *Dmp1Cre.Pthlh<sup>ff(hom)</sup>*  
347 embryos and adult male *Dmp1Cre.Pthlh<sup>ff(hom)</sup>* mice along the full length of the bone  
348 suggests that the maternal influence on bone widening determines radial expansion of  
349 the embryonic cartilage anlagen, the early cartilage model of the developing bone, rather  
350 than inducing periosteal apposition at the diaphysis. Maternal PTHrP may therefore limit  
351 radial expansion of chondrocytes during cartilage anlage development, and may suppress  
352 signalling pathways that promote expansion of chondrocytes at growth plate. This effect  
353 contrasts with actions of embryo-derived PTHrP from the placenta (5) and cartilage (30,  
354 31) to stimulate longitudinal bone growth. Although longitudinal bone growth has been  
355 studied widely, very little is known about signaling pathways orchestrating radial  
356 growth. There are two non-mutually-exclusive theories describing how bone radial width  
357 is determined: the “mechanostat” theory suggests that bone size and shape are adapt to  
358 mechanical strain (32, 33), while the “sizostat” theory suggests a set of genes regulates  
359 bone width to reach a pre-programmed setting (34). Although different genomic markers  
360 have been correlated with bone size and bone shape (35), no specific genes or molecular  
361 pathways have yet been described as major determinants of cortical bone diameter. Our  
362 data suggests that decidual PTHrP is a determinant for the cortical width sizostat.

363 Although both male and female *Dmp1Cre.Pthlh<sup>ff(hom)</sup>* mice had wider long bones at 12  
364 days of age, this phenotype was retained through to adulthood only in males, suggesting  
365 that the mechanisms controlling continued radial growth and bone width are sex-  
366 dependent. Although placental nutrition has sexually dimorphic effects on embryo



367 growth (36), we did not observe sex differences in this study until after 12 days, again  
368 emphasizing that the wide bone phenotype is unlikely to relate to placental nutrition.  
369 Post-pubertal sex differences in cortical diameter are common to all mammals (36-45),  
370 with females having narrower bones than males, however the molecular mechanisms  
371 driving this sexual dimorphism remain largely unknown; this mouse model may  
372 therefore shed new light on the mechanisms that contribute to this sexual dimorphism.  
373 The retention of this phenotype in males, but not females, suggests that hormonal  
374 changes at puberty in females may slow their radial growth. While most studies  
375 investigating sexual dimorphism in murine bone width have focused on periosteal  
376 growth at the diaphysis, our results suggest that differences between males and females  
377 in cortical width might also arise from radial expansion of the growth plate. Estradiol is  
378 known to slow longitudinal growth: a previous study has shown that ovariectomy  
379 increased tibial length and increased chondrocyte proliferation (46), and 17beta-  
380 estradiol treatment of 26-day-old female and male rats led to shorter tibial length and an  
381 early reduction in growth plate longitudinal width (46). Testosterone also affects  
382 chondrocytes: local injection of testosterone into the tibial epiphyseal growth plate of  
383 castrated growing male rats significantly increased epiphyseal growth plate length (47).  
384 Furthermore, while the perinatal testosterone surge is required for adult bone length,  
385 bone width is determined by post-pubertal testosterone (48). The cellular and  
386 intracellular pathways by which estradiol and/or testosterone differentially affect  
387 growth plate radial growth in control and *Dmp1Cre.Pthlh<sup>ff/hom</sup>* mice remains to be  
388 investigated.

389 In *Dmp1Cre.Pthlh<sup>ff/hom</sup>* mice, greater cortical width was not associated with greater total  
390 bone length. To our knowledge, this is the first evidence of changes in bone diameter  
391 independent of cortical thickness, longitudinal growth, and total body weight gain. All  
392 previously reported mouse models with changes in bone diameter also showed  
393 widespread skeletal development defects such as reduced bone length and width or  
394 altered cortical thickness (48-51). For example, mice lacking the endogenous nuclear  
395 localization sequence and C-terminus of PTHrP displayed retarded growth with lower  
396 body weight and total skeletal size at the age of 2 weeks (50), while Insulin-like growth  
397 factor I null (*Igf1<sup>-/-</sup>*) mice displayed smaller body size, shortened femoral length and  
398 reduced cortical thickness compared to wild type littermates (51, 52). Having altered  
399 radial, but not longitudinal, growth makes the *Dmp1Cre.Pthlh<sup>ff/hom</sup>* mouse an appealing  
400 model for studying specific mechanisms underlying radial bone growth. Discovering such  
401 mechanisms might open new therapeutic avenues for improving cortical bone strength  
402 and reducing fracture risk in growing children and in adults. If there is no change in  
403 material content, bones with wider cortices are more resistant to fracture (34, 53).  
404 Indeed, adult male *Dmp1Cre.Pthlh<sup>ff/hom</sup>* bones could withstand greater force, and  
405 experienced lower ultimate stress, before failure in three point bending tests compared  
406 to age- and sex-matched controls.

407 Although we detected PTHrP recombination in the mammary glands (7), milk PTHrP

408 levels were not significantly modified, and the wide-bone phenotype predated the  
409 commencement of suckling, indicating that a change in mammary supply of PTHrP is  
410 unlikely to cause the wide-bone phenotype we observed in *Dmp1Cre.Pthlh<sup>f/f(hom)</sup>* mice. We  
411 had thought that this may have been a possibility since we previously noted *Dmp1Cre*-  
412 driven PTHrP recombination in the mammary gland (7), and suckling pups from mice  
413 lacking PTHrP in the milk supply (*BLG-Cre/PTHrP<sup>lox/-</sup>*) had higher ash calcium content,  
414 indicating greater bone mass, compared to controls at day 12 of lactation (10). The  
415 normal levels of PTHrP in milk in mothers of *Dmp1Cre.Pthlh<sup>f/f(hom)</sup>* mice suggests that the  
416 mammary cells expressing *Dmp1Cre* are not the mammary epithelial cells that secrete  
417 PTHrP to the milk (54), and are different to those targeted in the *BLG-Cre/PTHrP<sup>lox/-</sup>*  
418 model (10, 55, 56). Another possibility is that the level of PTHrP recombination was too  
419 low in mammary tissues to modify milk PTHrP production.

420 In conclusion, decidual PTHrP limits trabecular bone mass, bone geometry and strength,  
421 not only of neonatal mice, but also of adult male mice. *Dmp1Cre.Pthlh<sup>f/f(hom)</sup>* embryos had  
422 accelerated skeletal development, with more mineralized and wider femora at E18.5.  
423 Although this effect was observed in both males and females in neonates, it was retained  
424 through to adulthood only in male mice. This indicates that maternal PTHrP limits bone  
425 growth, and this has a life-long influence on bone mass, shape and strength in male  
426 progeny.

## 427 **Materials and Methods**

### 428 Animal experiments

429 *Dmp1Cre.Pthlh<sup>f/f(het)</sup>* mice have been described previously (7) and were bred from  
430 *Dmp1Cre* (Tg(*Dmp1-cre*)<sup>1jqfe</sup>) mice (containing the *Dmp1* 10-kb promoter region)  
431 provided by Lynda Bonewald (University of Kansas, Kansas City, USA) (57), and *Pthlh*-  
432 flox (*Pthlh<sup>tm1Ack</sup>*) mice by Andrew Karaplis (McGill University, Montreal) (58) with LoxP  
433 sites spanning *Pthlh* exon III (7).

434

435 Two breeding strategies were used in this study (Figure 1A). Initially, mice hemizygous  
436 for *Dmp1Cre* were crossed with *Pthlh<sup>f/f</sup>* mice to generate *Dmp1Cre.Pthlh<sup>f/w</sup>* breeders.  
437 These were used to generate hemizygous-bred PTHrP deficient (*Dmp1Cre.Pthlh<sup>f/f(het)</sup>*)  
438 and *Dmp1Cre* mice, as in our previous study (7). *Dmp1Cre.Pthlh<sup>f/f(hom)</sup>* mice were  
439 generated from breeding pairs that were both *Dmp1Cre.Pthlh<sup>f/f(het)</sup>*. Cousin-matched  
440 *Dmp1Cre* mice were bred to generate homozygous-bred *Dmp1Cre* cousin controls  
441 (denoted *Dmp1Cre<sup>(hom)</sup>*). Adult mice were collected at 14 weeks (male only), and at 26  
442 weeks (both male and female) after an *in vivo* microCT scan at 16 weeks of age. Sample  
443 sizes used were based on our previous studies; no explicit power analysis was used.

444

445 12 day old pups were collected from both homozygous and heterozygous breeders. For  
446 the milk collection, mice were mated at 6 weeks of age, and after the mice became  
447 pregnant for the first time, males were removed. At day 12 of the (first) lactation, dams

448 were anesthetized and injected with 1 IU of oxytocin (Sigma) (59). After 5 minutes, milk  
449 was collected and then kept at -80°C.

450 *Dmp1Cre.Pthlh<sup>ff(hom)</sup>* and *Dmp1Cre<sup>(hom)</sup>* embryos and matching placenta/decidua were  
451 collected (4-7 litters/genotype) at embryonic day (E)18.5 of first pregnancy, and  
452 *Dmp1Cre.Pthlh<sup>ff(het)</sup>* embryos, placenta and decidua were collected at E17.5 of first  
453 pregnancy. The sex of embryos was determined by PCR, as described previously (60). All  
454 mice were housed at the St Vincent's BioResources Centre, in a 12 h light and dark cycle  
455 and provided food and water *ad libitum*. St. Vincent's Health Animal Ethics Committee  
456 approved all animal procedures. Terminal blood samples were collected by cardiac  
457 puncture exsanguination and sera kept at -80°C.

#### 458 Micro-computed tomography (micro-CT)

459 Micro-CT was carried out on samples from E17.5, E18.5, 12 days, 14 and 26 weeks of age.  
460 The observer was blinded to genotype and sex of all samples at the time of analysis. 26  
461 week old mice were also anaesthetized and scanned by *in vivo* micro-CT at 16 weeks of  
462 age. After collection, embryos were fixed in 95% ethanol for 5 days. Femora of 14 and 26  
463 week old mice, and tibiae of 12 day old mice were fixed overnight in 4%  
464 paraformaldehyde at 4°C, then stored in 70% ethanol until further analysis. Femoral and  
465 tibial morphology and microarchitecture were assessed using the Skyscan 1076 (E18.5,  
466 12 days, 14 and 26 weeks of age) or 1276 (E17.5) micro-CT system (Bruker, Aartselaar,  
467 Belgium), as described previously (61) with the following modifications.

468 For micro-CT analysis at E17.5 and E18.5, embryos were scanned at 55 kV and 200 mA,  
469 and 48 kV and 208 mA, respectively. Projections were acquired over a pixel size of 5µm  
470 and 9 µm, respectively. Image slices were then reconstructed by NRecon (Bruker, version  
471 1.7.1.0) with beam-hardening correction of 35%, ring artifact correction of 6, smoothing  
472 of 1, and defect pixel masking of 50%. The length of mineralized bone was measured in  
473 each femur. Femoral cortical structure was analyzed at three sites, based on the extent of  
474 mineralised femur: i) 20% of the mineralized length distal to the proximal end of the  
475 mineralized region (metaphysis; Top 20%); ii) Midshaft (Mid); iii) 20% of the  
476 mineralized length proximal to the distal end of the mineralized region (Bottom 20%).  
477 Automatic adaptive thresholding was used for each sample.

478 Tibiae from 12 day old mice were scanned at 37 kV and 228 mA. Regions of interest (ROI)  
479 commenced at a distance equal to 30% of the tibial length down the growth plate and an  
480 ROI of 10% of the tibial length was analyzed. The lower adaptive threshold limit used for  
481 cortical analysis was equivalent to 0.58 g/mm<sup>3</sup> Calcium hydroxyapatite (CaHA).

482 Femora from 14, 16 and 26 week old mice were scanned at 45 kV and 220 mA. For  
483 trabecular and cortical analyses, ROI commenced at a distance equal to 7.5% or 30%,  
484 respectively, of the total femur length proximal to the distal end of the femur; for each, an  
485 ROI of 15% of the total femur length was analyzed. For 14 week old mice, the lower

486 adaptive threshold limits for trabecular and cortical analysis were equivalent to 0.34  
487 g/mm<sup>3</sup> and 0.75 g/mm<sup>3</sup> CaHA, respectively. For 16 week old mice, the lower adaptive  
488 threshold for trabecular and cortical analysis were equivalent to 0.30 g/mm<sup>3</sup> and 0.64  
489 g/mm<sup>3</sup> CaHA, respectively. For 26 week old mice, the lower adaptive threshold for  
490 trabecular and cortical analysis were equivalent to 0.33 g/mm<sup>3</sup> and 0.76 g/mm<sup>3</sup> CaHA,  
491 respectively. For trabecular analysis in the 5<sup>th</sup> lumbar vertebrae (L5), an ROI of half the  
492 height of the bone (vertically centered) with a diameter 2/3 the width of the vertebral  
493 body was analysed.

#### 494 Histomorphometry

495 Tibiae from 14 week old mice were embedded in methylmethacrylate and sectioned at 5  
496 µm thickness for histomorphometric analysis, as previously described (62). The observer  
497 was blinded to genotype and sex of all samples during analysis. To determine bone  
498 formation rates, calcein was injected intraperitoneally (20 mg/kg) at 7 and 2 days before  
499 tissue collection. Sections were stained with Toluidine blue or Xylenol orange, as  
500 described (63). Static and dynamic histomorphometry of trabecular bone surfaces was  
501 carried out in the secondary spongiosa of the proximal tibia using the OsteoMeasure  
502 system (Osteometrics Inc., USA).

#### 503 Three-point bending test

504 Mechanical properties of femora were derived from three-point bending tests using a  
505 Bose Biodynamic 5500 Test Instrument (Bose, DE, USA), as described previously (64).  
506 The observer was blinded to genotype and sex of all samples during analysis. Once whole-  
507 bone properties were determined, tissue-level mechanical properties were calculated  
508 using micro-CT analysis of the mid-shaft (1).

#### 509 Biochemical assays

510 Cross-linked C-telopeptides of type I collagen (CTX-1) were measured in duplicate with  
511 the IDS RatLaps enzyme immunoassay (Abacus, Berkeley, CA, USA) in serum collected  
512 from mice fasted overnight. Serum levels of procollagen type 1 N propeptide (P1NP) were  
513 measured in duplicate using IDS Rat/Mouse PINP EIA kit (Abacus, Berkeley, CA, USA).

514 To measure milk PTHrP content, amino-terminal PTHrP RIA was carried out as  
515 previously described, with a sensitivity of 2 pM (65). Milk was diluted 1:500 in assay  
516 buffer prior to measurement of PTHrP. Milk PTHrP levels were also bioassayed as the  
517 cAMP generated in response to treatment of UMR106-01 cells, using PTH(1-34)-induced  
518 cAMP response as a standard curve (66). Replicate cell cultures in 24-well plates were  
519 incubated in cell culture medium with 1 mM isobutylmethylxanthine (IBMX) added. After  
520 treatment for 12 mins with 1:8 diluted milk samples, cAMP was measured by removing  
521 medium and adding acidified ethanol, drying, reconstituting in assay buffer and cAMP  
522 assay as described (67). cAMP was then corrected for total protein content of the milk,  
523 measured by Pierce BCA protein assay kit (Thermo Fisher Scientific). For this, milk was  
524 diluted 1:400 in PBS and absorbance was measured at OD562nm using the Polarstar

525 Optima+ and a bovine serum albumin standard curve.

#### 526 Embryo skeletal staining

527 Alcian blue and Alizarin red S staining was carried out on E18.5 embryos, as described  
528 previously (68). Embryos were fixed in 95% ethanol for 5 days after skin removal.  
529 Remnant skin and viscera were dissected as much as possible, followed by defatting in  
530 acetone for 2 days. Thereafter, they were stained for 4 days at 40 °C in freshly prepared  
531 staining solution: 0.3% Alcian blue in 70% ethanol - 1 volume; 0.1% alizarin red S in 95%  
532 ethanol - 1 volume; glacial acetic acid - 1 volume; 70% ethanol - 17 volumes. After washing  
533 in distilled water for 2 hours, they were cleared with 2% potassium hydroxide (KOH) for  
534 2 days. Afterwards, they were put in 20% Glycerol in 1% KOH until skeletons were clearly  
535 visible, then successively placed into 50%, 80% and 100% glycerol solutions in 1% KOH  
536 for 2 days each. Femoral length was determined by measuring the distance between  
537 femoral head and distal end through a dissecting microscope, and an average of right and  
538 left femur lengths in each embryo was calculated.

#### 539 Immunohistochemistry

540 Immunohistochemistry was carried out as described previously (69, 70) on paraffin-  
541 embedded placenta/decidua (collected at E17.5) using goat rabbit anti-PTHrP (1:1000,  
542 R87, generated against PTHrP(1-14) (71). The observer was blinded to genotype and sex  
543 of all samples during analysis. Placental/decidual samples were fixed overnight in 4%  
544 paraformaldehyde at 4°C, stored in 70% ethanol, and embedded in paraffin wax until  
545 further analysis. Sections (5µm) were taken onto chrome alum-coated slides, dewaxed in  
546 Histoclear (National Diagnostics, Atlanta, GA), and rehydrated in graded ethanols.  
547 Endogenous peroxidase was blocked for 30 min in 2% H<sub>2</sub>O<sub>2</sub> in methanol. After rinsing  
548 with 0.05 M phosphate buffered saline (PBS), samples were blocked with TNB  
549 (Renaissance TSA indirect (Tyramide Signal Amplification) PerkinElmer Life Sciences cat  
550 no- NEL700) for 60 min. PTHrP antibody (made against PTHrP (1-14) in house R87)  
551 1:1000 or rabbit IgG (negative control) was applied for 2 hr at room temperature in a  
552 humid chamber. A secondary antibody (swine anti-rabbit, Dako) was applied for 30 min  
553 at 1:300, followed by streptavidin horseradish peroxidase (Dako) 1:300 in the same  
554 blocking solution for 30 min. PTHrP staining was visualized with diaminobenzidine kit  
555 (Dako) and counterstained with Mayer's hematoxylin. Samples were rinsed in PBS  
556 between each step. PTHrP-DAB positive regions within the decidua and  
557 spongiotrophoblast zones were quantified with MetaMorph® image analysis software  
558 (Molecular Devices, San Jose, CA). The decidua and spongiotrophoblast zones were  
559 manually defined. Colour thresholding was applied and compared to negative controls.  
560 Integrated morphometry analysis was used to quantify DAB intensity, and frequency  
561 parameters.

#### 562 Statistical analysis

563 Statistically significant differences were determined by one-way or two-way ANOVA  
564 followed by Sidak's post-hoc test or Fishers LSD posthoc test (uncorrected). Student's t-

565 test was used where only one comparison was being made. To analyse PTHrP positive  
566 areas in decidua/placentae, area under the curves were compared by Student's t-test.  
567

568 **Acknowledgments**

569 The authors thank the staff of the St. Vincent's Health Bioresources Centre for excellent  
570 animal care and assistance. This work was partially supported by National Health and  
571 Medical Research Council (Australia) Project Grants to N.A.S. and T.J.M. N.A. was  
572 supported by The University of Melbourne International Research Scholarship and a St.  
573 Vincent's Institute top-up scholarship. T.I was supported by Travel Grants from Mochida  
574 Memorial Foundation for Medical and Pharmacological Research and The Foundation for  
575 Growth Science, Japan. N.A.S. is supported by a National Health and Medical Research  
576 Council (Australia) Senior Research Fellowship, and was supported in 2018 by the SVI  
577 Brenda Shanahan Fellowship. St. Vincent's Institute is supported by the Victorian  
578 Government's Operational Infrastructure Support Programme.

579 **Table 1.** Trabecular structure of L5 (5<sup>th</sup> lumbar vertebrae) from 14 week old male  
580 *Dmp1Cre.Pthlh<sup>f/f(hom)</sup>* and *Dmp1Cre<sup>(hom)</sup>* controls by microcomputed tomography. Values  
581 are mean ± SEM. n=9-10/group; \* p<0.05 vs *Dmp1Cre<sup>(hom)</sup>* by Student's t-test.

|                               | <i>Dmp1Cre<sup>(hom)</sup></i> | <i>Dmp1Cre.Pthlh<sup>f/f(hom)</sup></i> |
|-------------------------------|--------------------------------|-----------------------------------------|
| Trabecular bone volume/TV (%) | 17.84 ± 0.89                   | <b>21.32 ± 1.16*</b>                    |
| Trabecular number (/mm)       | 3.20 ± 0.13                    | <b>3.70 ± 0.15*</b>                     |
| Trabecular thickness (μm)     | 55.6 ± 1.3                     | 57.3 ± 1.0                              |
| Trabecular separation (μm)    | 203.5 ± 4.9                    | <b>185.4 ± 6.4*</b>                     |

582

583



584 **Table 2** Histomorphometry of tibia and serum biochemical data of 14 week-old male  
 585 *Dmp1Cre.Pthlh<sup>f/f(hom)</sup>* and *Dmp1Cre<sup>(hom)</sup>* controls. Histomorphometry was measured in the  
 586 distal tibial metaphyseal secondary spongiosa. Values are mean  $\pm$  SEM. n=7-10/group.  
 587 Abbreviations: BV: bone volume; BS: bone surface; B. Pm: bone perimeter; N.Ob:  
 588 osteoblast numbers; B.Pm: bone perimeter; N.Oc: osteoclast numbers; Oc.Pm: osteoclast  
 589 perimeter; P1NP: Procollagen type 1 N-terminal propeptide; CTX1: C-telopeptide of type  
 590 1 collagen.

|                                                   | <i>Dmp1Cre<sup>(hom)</sup></i> | <i>Dmp1Cre.Pthlh<sup>f/f(hom)</sup></i> |
|---------------------------------------------------|--------------------------------|-----------------------------------------|
| Osteoid surface/BS (%)                            | 6.16 $\pm$ 1.85                | 6.47 $\pm$ 1.83                         |
| Osteoid thickness ( $\mu$ m)                      | 0.90 $\pm$ 0.11                | 1.20 $\pm$ 0.23                         |
| Osteoblast surface/BS (%)                         | 7.83 $\pm$ 2.46                | 9.02 $\pm$ 2.55                         |
| Osteoblast numbers (N.Ob/B.Pm) (N/mm)             | 6.72 $\pm$ 2.09                | 7.77 $\pm$ 2.16                         |
| Osteoclast surface/BS (%)                         | 3.77 $\pm$ 0.38                | 3.86 $\pm$ 0.44                         |
| Osteoclast numbers (N.Oc/B.Pm) (N/mm)             | 1.79 $\pm$ 0.29                | 1.93 $\pm$ 0.23                         |
| N.Oc/Oc.Pm (N/mm)                                 | 46.60 $\pm$ 6.18               | 49.79 $\pm$ 1.50                        |
| Single-labeled mineralizing surface (sL.S/BS) (%) | 22.4 $\pm$ 2.4                 | 20.8 $\pm$ 3.8                          |
| Double-labeled mineralizing surface (dL.S/BS) (%) | 12.9 $\pm$ 2.9                 | 15.9 $\pm$ 4.2                          |
| Mineralising surface/BS (%)                       | 24.2 $\pm$ 2.0                 | 26.3 $\pm$ 3.3                          |
| Mineral apposition rate ( $\mu$ m/day)            | 1.09 $\pm$ 0.08                | 1.05 $\pm$ 0.15                         |
| Bone formation rate/BV (%/day)                    | 1.30 $\pm$ 0.10                | 1.41 $\pm$ 0.32                         |
| P1NP (ng/ml)                                      | 29.6 $\pm$ 2.3                 | 36.6 $\pm$ 4.1                          |
| CTX1 (ng/ml)                                      | 25.4 $\pm$ 1.8                 | 21.5 $\pm$ 1.6                          |

591

592 **Table 3.** Additional strength data from three point bending test on femora from 14 and 26 week old *Dmp1Cre.Pthlh<sup>f/f(hom)</sup>* (f/f) and  
 593 *Dmp1Cre<sup>(hom)</sup>* (w/w) mice. Values are mean  $\pm$  SEM. n=9-10/group; \*p<0.05, \*\*p<0.01, and \*\*\*p<0.001 vs sex- and age-matched w/w by  
 594 Student's t-test (14 weeks old) and two-way ANOVA (26 weeks old) with uncorrected Fishers LSD post-hoc test.  
 595

|                                      | 14 week old        |                                     | 26 week old      |                                      |                   |                                     |
|--------------------------------------|--------------------|-------------------------------------|------------------|--------------------------------------|-------------------|-------------------------------------|
|                                      | Males              |                                     | Males            |                                      | Females           |                                     |
|                                      | w/w                | f/f                                 | w/w              | f/f                                  | w/w               | f/f                                 |
| Moment of inertia (mm <sup>4</sup> ) | 0.76 $\pm$ 0.06    | <b>1.16 <math>\pm</math> 0.10**</b> | 0.62 $\pm$ 0.05  | <b>1.16 <math>\pm</math> 0.09***</b> | 0.59 $\pm$ 0.03   | 0.67 $\pm$ 0.03                     |
| <b>Whole bone parameters</b>         |                    |                                     |                  |                                      |                   |                                     |
| Yield force (N)                      | 12.64 $\pm$ 0.63   | 13.85 $\pm$ 0.94                    | 11.50 $\pm$ 0.44 | 13.71 $\pm$ 0.96                     | 12.61 $\pm$ 0.84  | <b>15.73 <math>\pm</math> 1.61*</b> |
| Yield displacement ( $\mu$ m)        | 436.9 $\pm$ 56.2   | 454.4 $\pm$ 43.2                    | 157.4 $\pm$ 13.5 | 161.3 $\pm$ 15.2                     | 132.4 $\pm$ 11.5  | <b>190.8 <math>\pm</math> 25.5*</b> |
| Post-yield displacement ( $\mu$ m)   | 298.4 $\pm$ 53.6   | 388.9 $\pm$ 44.4                    | 293.7 $\pm$ 20.1 | 238.3 $\pm$ 36.9                     | 200.0 $\pm$ 38.9  | 154.2 $\pm$ 28.9                    |
| Failure force (N)                    | 14.26 $\pm$ 1.63   | 15.88 $\pm$ 1.21                    | 14.99 $\pm$ 0.47 | <b>18.25 <math>\pm</math> 0.73*</b>  | 18.04 $\pm$ 0.97  | 20.06 $\pm$ 1.18                    |
| Stiffness (N/mm)                     | 49.8 $\pm$ 7.0     | 66.9 $\pm$ 7.3                      | 92.33 $\pm$ 4.95 | 111.06 $\pm$ 9.77                    | 114.02 $\pm$ 4.07 | 106.27 $\pm$ 6.93                   |
| <b>Tissue level parameters</b>       |                    |                                     |                  |                                      |                   |                                     |
| Ultimate strain (%)                  | 5.31 $\pm$ 0.46    | <b>6.81 <math>\pm</math> 0.47*</b>  | 6.84 $\pm$ 0.45  | 8.13 $\pm$ 0.85                      | 5.97 $\pm$ 0.29   | 7.17 $\pm$ 0.50                     |
| Yield strain (%)                     | 4.23 $\pm$ 0.50    | 4.77 $\pm$ 0.46                     | 3.30 $\pm$ 0.28  | 3.81 $\pm$ 0.34                      | 2.88 $\pm$ 0.24   | <b>4.25 <math>\pm</math> 0.55*</b>  |
| Post-yield strain (%)                | 2.91 $\pm$ 0.50    | 4.07 $\pm$ 0.46                     | 6.15 $\pm$ 0.41  | 5.69 $\pm$ 0.92                      | 4.38 $\pm$ 0.86   | 3.43 $\pm$ 0.64                     |
| Failure strain (%)                   | 7.15 $\pm$ 0.29    | <b>8.84 <math>\pm</math> 0.54**</b> | 9.44 $\pm$ 0.40  | 9.50 $\pm$ 1.02                      | 7.26 $\pm$ 0.75   | 7.68 $\pm$ 0.52                     |
| Toughness (mJ/mm <sup>3</sup> )      | 1.33 $\pm$ 0.10    | 1.29 $\pm$ 0.11                     | 1.74 $\pm$ 0.13  | <b>1.13 <math>\pm</math> 0.13**</b>  | 1.53 $\pm$ 0.19   | 1.42 $\pm$ 0.13                     |
| Elastic modulus (MPa)                | 1009.4 $\pm$ 136.4 | 852.4 $\pm$ 73.2                    | 692.1 $\pm$ 48.4 | <b>450.0 <math>\pm</math> 47.2**</b> | 891.5 $\pm$ 57.2  | <b>718.9 <math>\pm</math> 49.5*</b> |

596 **Table 4.** Trabecular bone structure of 12 day old *Dmp1Cre.Pthlh<sup>ff(hom)</sup>* and *Dmp1Cre<sup>(hom)</sup>* mice. Trabecular bone was measured by  
 597 histomorphometry in male and female tibiae. Data is shown as mean  $\pm$  SEM.

|                                  | Male                                 |                                                            | Female                                  |                                              |
|----------------------------------|--------------------------------------|------------------------------------------------------------|-----------------------------------------|----------------------------------------------|
|                                  | <i>Dmp1Cre<sup>(hom)</sup></i> (n=6) | <i>Dmp1Cre.Pthlh<sup>ff</sup></i><br><i>(hom)</i><br>(n=4) | <i>Dmp1Cre<sup>(hom)</sup></i><br>(n=4) | <i>Dmp1Cre.Pthlh<sup>ff(hom)</sup></i> (n=3) |
| Trabecular bone volume (%)       | 3.65 $\pm$ 1.00                      | 5.19 $\pm$ 2.11                                            | 2.78 $\pm$ 0.98                         | 8.38 $\pm$ 4.70                              |
| Trabecular number (/mm)          | 1.36 $\pm$ 0.30                      | 1.84 $\pm$ 0.44                                            | 1.12 $\pm$ 0.32                         | 2.51 $\pm$ 0.92                              |
| Trabecular thickness ( $\mu$ m)  | 24.85 $\pm$ 2.38                     | 25.63 $\pm$ 3.78                                           | 24.13 $\pm$ 2.27                        | 29.15 $\pm$ 5.97                             |
| Trabecular separation ( $\mu$ m) | 1101.06 $\pm$ 407.40                 | 589.18 $\pm$ 103.76                                        | 1344.61 $\pm$ 607.52                    | 476.28 $\pm$ 155.84                          |

598

599

600 **Table 5.** Biochemical analysis of milk samples. PTHrP content was measured by radioimmunoassay (RIA) in milk samples from mothers  
 601 of *Dmp1Cre.Pthlh<sup>f/f(hom)</sup>* and *Dmp1Cre<sup>(hom)</sup>* mice on day 12 of lactation. PTHrP equivalent concentration was measured by measuring cAMP  
 602 response to milk treatment of UMR106-01 cells (bioassay). Data shown as mean ± SEM. n=7/group. No significant differences relating to  
 603 genotype were detected by Student's t-test.  
 604

| Mothers of:                                          | <i>Dmp1Cre<sup>(hom)</sup></i> | <i>Dmp1Cre.Pthlh<sup>f/f(hom)</sup></i> |
|------------------------------------------------------|--------------------------------|-----------------------------------------|
| <b>PTHrP (pmol)/milk protein (g) by RIA</b>          | 64.54 ± 13.53                  | 45.53 ± 5.12                            |
| <b>PTHrP (pmol)/milk protein (g) by<br/>bioassay</b> | 581.68 ±<br>43.57              | 582.80 ± 90.97                          |
| <b>Milk protein (g/L)</b>                            | 100.42 ± 4.16                  | 99.28 ± 7.61                            |

605

## 606 References

607

- 608 1. Jepsen KJ, Silva MJ, Vashishth D, Guo XE, van der Meulen MC. Establishing  
609 biomechanical mechanisms in mouse models: practical guidelines for systematically  
610 evaluating phenotypic changes in the diaphyses of long bones. *J Bone Miner Res.*  
611 2015;30(6):951-66.
- 612 2. Abad V, Meyers JL, Weise M, Gafni RI, Barnes KM, Nilsson O, et al. The role of the  
613 resting zone in growth plate chondrogenesis. *Endocrinology.* 2002;143(5):1851-7.
- 614 3. Pazzaglia UE, Beluffi G, Benetti A, Bondioni MP, Zarattini G. A review of the actual  
615 knowledge of the processes governing growth and development of long bones. *Fetal and*  
616 *pediatric pathology.* 2011;30(3):199-208.
- 617 4. Martin TJ. Parathyroid Hormone-Related Protein, Its Regulation of Cartilage and  
618 Bone Development, and Role in Treating Bone Diseases. *Physiol Rev.* 2016;96(3):831-71.
- 619 5. Karaplis AC, Luz A, Glowacki J, Bronson RT, Tybulewicz VL, Kronenberg HM, et  
620 al. Lethal skeletal dysplasia from targeted disruption of the parathyroid hormone-related  
621 peptide gene. *Genes & Development.* 1994;8(3):277-89.
- 622 6. Miao D, He B, Jiang Y, Kobayashi T, Soroceanu MA, Zhao J, et al. Osteoblast-  
623 derived PTHrP is a potent endogenous bone anabolic agent that modifies the therapeutic  
624 efficacy of administered PTH 1-34. *J Clin Invest.* 2005;115(9):2402-11.
- 625 7. Ansari N, Ho PW, Crimeen-Irwin B, Poulton IJ, Brunt AR, Forwood MR, et al.  
626 Autocrine and Paracrine Regulation of the Murine Skeleton by Osteocyte-Derived  
627 Parathyroid Hormone-Related Protein. *J Bone Miner Res.* 2018;33(1):137-53.
- 628 8. Standal T, Johnson RW, McGregor NE, Poulton IJ, Ho PW, Martin TJ, et al. gp130 in  
629 late osteoblasts and osteocytes is required for PTH-induced osteoblast differentiation. *J*  
630 *Endocrinol.* 2014;223(2):181-90.
- 631 9. Cho DC, Brennan HJ, Johnson RW, Poulton IJ, Gooi JH, Tonkin BA, et al. Bone  
632 corticalization requires local SOCS3 activity and is promoted by androgen action via  
633 interleukin-6. *Nat Commun.* 2017;8(1):806.
- 634 10. Mamillapalli R, VanHouten J, Dann P, Bikle D, Chang W, Brown E, et al. Mammary-  
635 specific ablation of the calcium-sensing receptor during lactation alters maternal calcium  
636 metabolism, milk calcium transport, and neonatal calcium accrual. *Endocrinology.*  
637 2013;154(9):3031-42.
- 638 11. Karperien M, Lanser P, de Laat SW, Boonstra J, Defize LH. Parathyroid hormone  
639 related peptide mRNA expression during murine postimplantation development: evidence for  
640 involvement in multiple differentiation processes. *The International journal of developmental*  
641 *biology.* 1996;40(3):599-608.
- 642 12. Kovacs CS, Lanske B, Hunzelman JL, Guo J, Karaplis AC, Kronenberg HM.  
643 Parathyroid hormone-related peptide (PTHrP) regulates fetal-placental calcium transport  
644 through a receptor distinct from the PTH/PTHrP receptor. *Proc Natl Acad Sci U S A.*  
645 1996;93(26):15233-8.
- 646 13. Ferguson JE, 2nd, Gorman JV, Bruns DE, Weir EC, Burtis WJ, Martin TJ, et al.  
647 Abundant expression of parathyroid hormone-related protein in human amnion and its  
648 association with labor. *Proceedings of the National Academy of Sciences of the United States*  
649 *of America.* 1992;89(17):8384-8.
- 650 14. Williams ED, Leaver DD, Danks JA, Moseley JM, Martin TJ. Effect of parathyroid  
651 hormone-related protein (PTHrP) on the contractility of the myometrium and localization of  
652 PTHrP in the uterus of pregnant rats. *J Reprod Fertil.* 1994;102(1):209-14.

- 653 15. Meziani F, Van Overloop B, Schneider F, Gairard A. Parathyroid hormone-related  
654 protein-induced relaxation of rat uterine arteries: influence of the endothelium during  
655 gestation. *J Soc Gynecol Investig.* 2005;12(1):14-9.
- 656 16. Ramathal CY, Bagchi IC, Taylor RN, Bagchi MK. Endometrial decidualization: of  
657 mice and men. *Semin Reprod Med.* 2010;28(1):17-26.
- 658 17. Okada H, Tsuzuki T, Murata H. Decidualization of the human endometrium. *Reprod*  
659 *Med Biol.* 2018;17(3):220-7.
- 660 18. Sherafat-Kazemzadeh R, Schroeder JK, Kessler CA, Handwerger S. Parathyroid  
661 hormone-like hormone (PTHrP) represses decidualization of human uterine fibroblast cells  
662 by an autocrine/paracrine mechanism. *The Journal of clinical endocrinology and metabolism.*  
663 2011;96(2):509-14.
- 664 19. Williams ED, Major BJ, Martin TJ, Moseley JM, Leaver DD. Effect of antagonism of  
665 the parathyroid hormone (PTH)/PTH-related protein receptor on decidualization in rat uterus.  
666 *J Reprod Fertil.* 1998;112(1):59-67.
- 667 20. Katoh N, Kuroda K, Tomikawa J, Ogata-Kawata H, Ozaki R, Ochiai A, et al.  
668 Reciprocal changes of H3K27ac and H3K27me3 at the promoter regions of the critical genes  
669 for endometrial decidualization. *Epigenomics.* 2018;10(9):1243-57.
- 670 21. Lim J, Burclaff J, He G, Mills JC, Long F. Unintended targeting of. *Bone Res.*  
671 2017;5:16049.
- 672 22. San Martin S, Fitzgerald JS, Weber M, Párraga M, Sáez T, Zorn TM, et al. Stat3 and  
673 Socs3 expression patterns during murine placenta development. *Eur J Histochem.*  
674 2013;57(2):e19-e.
- 675 23. Ni H, Ding N-Z, Harper MJK, Yang Z-M. Expression of leukemia inhibitory factor  
676 receptor and gp130 in mouse uterus during early pregnancy. *Molecular reproduction and*  
677 *development.* 2002;63(2):143-50.
- 678 24. Johnson RW, Brennan HJ, Vrahnas C, Poulton IJ, McGregor NE, Standal T, et al. The  
679 primary function of gp130 signaling in osteoblasts is to maintain bone formation and  
680 strength, rather than promote osteoclast formation. *J Bone Miner Res.* 2014;29(6):1492-505.
- 681 25. Murphy VE, Smith R, Giles WB, Clifton VL. Endocrine regulation of human fetal  
682 growth: the role of the mother, placenta, and fetus. *Endocrine reviews.* 2006;27(2):141-69.
- 683 26. Holroyd CR, Osmond C, Barker DJ, Ring SM, Lawlor DA, Tobias JH, et al. Placental  
684 Size Is Associated Differentially With Postnatal Bone Size and Density. *J Bone Miner Res.*  
685 2016;31(10):1855-64.
- 686 27. Smith FG, Jr., Alexander DP, Buckle RM, Britton HG, Nixon DA. Parathyroid  
687 hormone in foetal and adult sheep: the effect of hypocalcaemia. *The Journal of*  
688 *endocrinology.* 1972;53(3):339-48.
- 689 28. Brown EM, Gamba G, Riccardi D, Lombardi M, Butters R, Kifor O, et al. Cloning  
690 and characterization of an extracellular Ca(2+)-sensing receptor from bovine parathyroid.  
691 *Nature.* 1993;366(6455):575-80.
- 692 29. Miao D, He B, Karaplis AC, Goltzman D. Parathyroid hormone is essential for  
693 normal fetal bone formation. *J Clin Invest.* 2002;109(9):1173-82.
- 694 30. Lanske B, Karaplis AC, Lee K, Luz A, Vortkamp A, Pirro A, et al. PTH/PTHrP  
695 receptor in early development and Indian hedgehog-regulated bone growth. *Science.*  
696 1996;273(5275):663-6.
- 697 31. Kronenberg HM. PTHrP and skeletal development. *Annals of the New York*  
698 *Academy of Sciences.* 2006;1068:1-13.
- 699 32. Frost HM. Mechanical determinants of bone modeling. *Metab Bone Dis Relat Res.*  
700 1982;4(4):217-29.

- 701 33. Frost HM. The mechanostat: a proposed pathogenic mechanism of osteoporoses and  
702 the bone mass effects of mechanical and nonmechanical agents. *Bone Miner.* 1987;2(2):73-  
703 85.
- 704 34. Rauch F. Bone growth in length and width: the Yin and Yang of bone stability. *J*  
705 *Musculoskelet Neuronal Interact.* 2005;5(3):194-201.
- 706 35. Volkman SK, Galecki AT, Burke DT, Paczas MR, Moalli MR, Miller RA, et al.  
707 Quantitative trait loci for femoral size and shape in a genetically heterogeneous mouse  
708 population. *Journal of bone and mineral research : the official journal of the American*  
709 *Society for Bone and Mineral Research.* 2003;18(8):1497-505.
- 710 36. Aiken CE, Ozanne SE. Sex differences in developmental programming models.  
711 *Reproduction.* 2013;145(1):R1-13.
- 712 37. Oyster N. Sex differences in cancellous and cortical bone strength, bone mineral  
713 content and bone density. *Age Ageing.* 1992;21(5):353-6.
- 714 38. Nelson DA, Megyesi MS. Sex and ethnic differences in bone architecture. *Current*  
715 *osteoporosis reports.* 2004;2(2):65-9.
- 716 39. Gabel L, Macdonald HM, McKay HA. Sex Differences and Growth-Related  
717 Adaptations in Bone Microarchitecture, Geometry, Density, and Strength From Childhood to  
718 Early Adulthood: A Mixed Longitudinal HR-pQCT Study. *Journal of bone and mineral*  
719 *research : the official journal of the American Society for Bone and Mineral Research.*  
720 2017;32(2):250-63.
- 721 40. Evans RK, Negus C, Antczak AJ, Yanovich R, Israeli E, Moran DS. Sex differences  
722 in parameters of bone strength in new recruits: beyond bone density. *Med Sci Sports Exerc.*  
723 2008;40(11 Suppl):S645-53.
- 724 41. Eckstein F, Matsuura M, Kuhn V, Priemel M, Muller R, Link TM, et al. Sex  
725 differences of human trabecular bone microstructure in aging are site-dependent. *J Bone*  
726 *Miner Res.* 2007;22(6):817-24.
- 727 42. Beck TJ, Ruff CB, Scott WW, Jr., Plato CC, Tobin JD, Quan CA. Sex differences in  
728 geometry of the femoral neck with aging: a structural analysis of bone mineral data. *Calcified*  
729 *tissue international.* 1992;50(1):24-9.
- 730 43. Amin S, Khosla S. Sex- and age-related differences in bone microarchitecture in men  
731 relative to women assessed by high-resolution peripheral quantitative computed tomography.  
732 *J Osteoporos.* 2012;2012:129760.
- 733 44. Sigurdsson G, Aspelund T, Chang M, Jonsdottir B, Sigurdsson S, Eiriksdottir G, et al.  
734 Increasing sex difference in bone strength in old age: The Age, Gene/Environment  
735 Susceptibility-Reykjavik study (AGES-REYKJAVIK). *Bone.* 2006;39(3):644-51.
- 736 45. Ackerman A, Thornton JC, Wang J, Pierson RN, Jr., Horlick M. Sex difference in the  
737 effect of puberty on the relationship between fat mass and bone mass in 926 healthy subjects,  
738 6 to 18 years old. *Obesity (Silver Spring).* 2006;14(5):819-25.
- 739 46. van der Eerden BC, Emons J, Ahmed S, van Essen HW, Lowik CW, Wit JM, et al.  
740 Evidence for genomic and nongenomic actions of estrogen in growth plate regulation in  
741 female and male rats at the onset of sexual maturation. *The Journal of endocrinology.*  
742 2002;175(2):277-88.
- 743 47. Ren SG, Malozowski S, Sanchez P, Sweet DE, Loriaux DL, Cassorla F. Direct  
744 administration of testosterone increases rat tibial epiphyseal growth plate width. *Acta*  
745 *Endocrinol (Copenh).* 1989;121(3):401-5.
- 746 48. Sims NA, Brennan K, Spaliviero J, Handelsman DJ, Seibel MJ. Perinatal testosterone  
747 surge is required for normal adult bone size but not for normal bone remodeling. *Am J*  
748 *Physiol Endocrinol Metab.* 2006;290(3):E456-62.

- 749 49. Ye L, Mishina Y, Chen D, Huang H, Dallas SL, Dallas MR, et al. Dmp1-deficient  
750 mice display severe defects in cartilage formation responsible for a chondrodysplasia-like  
751 phenotype. *The Journal of biological chemistry*. 2005;280(7):6197-203.
- 752 50. Miao D, Su H, He B, Gao J, Xia Q, Zhu M, et al. Severe growth retardation and early  
753 lethality in mice lacking the nuclear localization sequence and C-terminus of PTH-related  
754 protein. *Proc Natl Acad Sci U S A*. 2008;105(51):20309-14.
- 755 51. Bikle D, Majumdar S, Laib A, Powell-Braxton L, Rosen C, Beamer W, et al. The  
756 skeletal structure of insulin-like growth factor I-deficient mice. *Journal of bone and mineral  
757 research : the official journal of the American Society for Bone and Mineral Research*.  
758 2001;16(12):2320-9.
- 759 52. Liu JP, Baker J, Perkins AS, Robertson EJ, Efstratiadis A. Mice carrying null  
760 mutations of the genes encoding insulin-like growth factor I (Igf-1) and type I IGF receptor  
761 (Igf1r). *Cell*. 1993;75(1):59-72.
- 762 53. Vashissth D. Small animal bone biomechanics. *Bone*. 2008;43(5):794-7.
- 763 54. Ferrari SL, Rizzoli R, Bonjour JP. Parathyroid hormone-related protein production by  
764 primary cultures of mammary epithelial cells. *Journal of cellular physiology*.  
765 1992;150(2):304-11.
- 766 55. Hyttinen JM, Korhonen VP, Hiltunen MO, Myohanen S, Janne J. High-level  
767 expression of bovine beta-lactoglobulin gene in transgenic mice. *J Biotechnol*.  
768 1998;61(3):191-8.
- 769 56. VanHouten JN, Dann P, Stewart AF, Watson CJ, Pollak M, Karaplis AC, et al.  
770 Mammary-specific deletion of parathyroid hormone-related protein preserves bone mass  
771 during lactation. *Journal of Clinical Investigation*. 2003;112(9):1429-36.
- 772 57. Lu Y, Xie Y, Zhang S, Dusevich V, Bonewald LF, Feng JQ. DMP1-targeted Cre  
773 expression in odontoblasts and osteocytes. *J Dent Res*. 2007;86(4):320-5.
- 774 58. He B, Deckelbaum RA, Miao D, Lipman ML, Pollak M, Goltzman D, et al. Tissue-  
775 specific targeting of the pthrp gene: the generation of mice with floxed alleles.  
776 *Endocrinology*. 2001;142(5):2070-7.
- 777 59. Gillies BR, Ryan BA, Tonkin BA, Poulton IJ, Ma Y, Kirby BJ, et al. Absence of  
778 Calcitriol Causes Increased Lactational Bone Loss and Lower Milk Calcium but Does Not  
779 Impair Post-lactation Bone Recovery in Cyp27b1 Null Mice. *J Bone Miner Res*.  
780 2018;33(1):16-26.
- 781 60. McFarlane L, Truong V, Palmer JS, Wilhelm D. Novel PCR assay for determining the  
782 genetic sex of mice. *Sex Dev*. 2013;7(4):207-11.
- 783 61. Takyar FM, Tonna S, Ho PW, Crimeen-Irwin B, Baker EK, Martin TJ, et al.  
784 EphrinB2/EphB4 inhibition in the osteoblast lineage modifies the anabolic response to  
785 parathyroid hormone. *J Bone Miner Res*. 2013;28(4):912-25.
- 786 62. Sims NA, Clement-Lacroix P, Da Ponte F, Bouali Y, Binart N, Moriggl R, et al. Bone  
787 homeostasis in growth hormone receptor-null mice is restored by IGF-I but independent of  
788 Stat5. *J Clin Invest*. 2000;106(9):1095-103.
- 789 63. Sims NA, Jenkins BJ, Nakamura A, Quinn JM, Li R, Gillespie MT, et al. Interleukin-  
790 11 receptor signaling is required for normal bone remodeling. *J Bone Miner Res*.  
791 2005;20(7):1093-102.
- 792 64. Williamson L, Hayes A, Hanson ED, Pivonka P, Sims NA, Gooi JH. High dose  
793 dietary vitamin D3 increases bone mass and strength in mice. *Bone Rep*. 2017;6:44-50.
- 794 65. Grill V, Ho P, Body JJ, Johanson N, Lee SC, Kukreja SC, et al. Parathyroid hormone-  
795 related protein: elevated levels in both humoral hypercalcemia of malignancy and  
796 hypercalcemia complicating metastatic breast cancer. *J Clin Endocrinol Metab*.  
797 1991;73(6):1309-15.



- 798 66. Ho PW, Goradia A, Russell MR, Chalk AM, Milley KM, Baker EK, et al.  
799 Knockdown of PTHR1 in osteosarcoma cells decreases invasion and growth and increases  
800 tumor differentiation in vivo. *Oncogene*. 2015;34(22):2922-33.
- 801 67. Hammonds RG, Jr., McKay P, Winslow GA, Diefenbach-Jagger H, Grill V, Glatz J,  
802 et al. Purification and characterization of recombinant human parathyroid hormone-related  
803 protein. *The Journal of biological chemistry*. 1989;264(25):14806-11.
- 804 68. McLeod MJ. Differential staining of cartilage and bone in whole mouse fetuses by  
805 alcian blue and alizarin red S. *Teratology*. 1980;22(3):299-301.
- 806 69. McGregor NE, Poulton IJ, Walker EC, Pompolo S, Quinn JM, Martin TJ, et al.  
807 Ciliary neurotrophic factor inhibits bone formation and plays a sex-specific role in bone  
808 growth and remodeling. *Calcif Tissue Int*. 2010;86(3):261-70.
- 809 70. Walker EC, McGregor NE, Poulton IJ, Solano M, Pompolo S, Fernandes TJ, et al.  
810 Oncostatin M promotes bone formation independently of resorption when signaling through  
811 leukemia inhibitory factor receptor in mice. *J Clin Invest*. 2010;120(2):582-92.
- 812 71. Lam MH, Thomas RJ, Loveland KL, Schilders S, Gu M, Martin TJ, et al. Nuclear  
813 transport of parathyroid hormone (PTH)-related protein is dependent on microtubules.  
814 *Molecular endocrinology*. 2002;16(2):390-401.
- 815  
816  
817

## 818 Legends to Figure Supplements

819 **Figure 1 Supplement 1: No difference in trabecular structure or metaphyseal**  
820 **diameter in femora from *Dmp1Cre.Pthlh<sup>ff(het)</sup>* mice and littermate *Dmp1Cre<sup>(het)</sup>***  
821 **controls.** Trabecular structure of distal femoral primary spongiosa analysed by micro-  
822 CT in male and female mice at 16 and 26 weeks of age. Trabecular bone volume,  
823 trabecular number, trabecular thickness, trabecular separation, and metaphyseal  
824 periosteal perimeter are shown as mean (dot), interquartile range (box), median (line)  
825 and range; n=9-10/group. No significant differences associated with genotype were  
826 detected (two-way ANOVA). Y-axes are drawn to match those of Figure 1 to allow  
827 comparison with *Dmp1Cre.Pthlh<sup>ff(hom)</sup>* mice. Breeding strategy is shown in Figure 1A.

828 **Figure 2 Supplement 1: Cortical bone structure in femora from *Dmp1Cre.Pthlh<sup>ff(het)</sup>***  
829 **mice and littermate *Dmp1Cre<sup>(het)</sup>* controls. A:** Schematic showing measurement  
830 regions (note, this is identical to Figure 2A, and is reproduced here for convenience).  
831 Length (B) and cortical dimensions of femora from male and female mice at 16 and 26  
832 weeks of age. Anteroposterior (C) and mediolateral (D) width, measured by micro-CT at  
833 the midshaft. E-I: Femoral marrow area (E), cortical bone area (F), thickness (G), and  
834 both endocortical (H) and periosteal (I) perimeter were analysed in cortical ROI by  
835 micro-CT. Data are shown as mean (dot), interquartile range (box), median (line) and  
836 range; n=9-10/group. \*p<0.05, and \*\*p<0.01 compared to sex- and age-matched  
837 *Dmp1Cre<sup>(het)</sup>* by two-way ANOVA. Y-axes are drawn to match those of Figure 2 to allow  
838 comparison with *Dmp1Cre.Pthlh<sup>ff(hom)</sup>* mice. Breeding strategy is shown in Figure 1A.

839 **Figure 3 Supplement 1: No change in bone strength measured by 3 point bending**  
840 **tests in heterozygous-bred *Dmp1Cre.Pthlh<sup>ff(het)</sup>* femora compared to littermate**  
841 ***Dmp1Cre<sup>(het)</sup>* controls at 26 weeks of age.** Shown are ultimate force (A), ultimate  
842 deformation (B), ultimate stress (C), yield stress (D), and failure stress (E). Data shown  
843 as mean (dot), interquartile range (box), median (line) and range, n=9-10/group. No  
844 significant differences relating to genotype were detected by two-way ANOVA.

845 **Figure 5 Supplement 1: Additional micro-CT data of E18.5 *Dmp1Cre.Pthlh<sup>ff(hom)</sup>***  
846 **embryos.** Bone area and tissue area were analysed in cortical ROI by micro-CT in three  
847 different regions of femora: 20% of the mineralized length distal to the proximal end of  
848 the mineralized region (Top 20%), midshaft (Mid), and 20% of the mineralized length  
849 proximal to the distal end of the mineralized region (Bottom 20%); see Figure 5A. Data  
850 is shown as mean ± SEM with individual data points, \*p<0.05 and \*\*p<0.01 compared to  
851 controls by two-way ANOVA.

852 **Figure 5 Supplement 2: Bone structure of E17.5 *Dmp1Cre.Pthlh<sup>ff(het)</sup>* femora. A)**  
853 **Mineralized femoral length, mediolateral width (B,H), anteroposterior width (C,I),**  
854 **mean polar moment of inertia (D,G), bone area (I,K), and cross sectional area (J,L) of**  
855 ***Dmp1Cre.Pthlh<sup>ff(het)</sup>* and *Dmp1Cre<sup>(het)</sup>* embryos measured in three different regions of**  
856 **femora: 20% of the mineralized length distal to the proximal end of the mineralized**

857 region (Top 20%), midshaft (Mid), and 20% of the mineralized length proximal to the  
858 distal end of the mineralized region (Bottom 20%). Data is shown as mean  $\pm$  SEM with  
859 individual data points. No significant differences relating to genotype were detected by  
860 two-way ANOVA.

861 **Figure 6 Supplement 1: Embryo weight, placental weight, and decidual PTHrP of**  
862 ***Dmp1Cre.Pthlh<sup>ff(het)</sup>* mice.** Embryo weight (A), placental weight (B) and embryo to  
863 placental weight ratio (C) of *Dmp1Cre.Pthlh<sup>ff(het)</sup>* and *Dmp1Cre<sup>(het)</sup>* embryos at E17.5. (D)  
864 Frequency of PTHrP stained objects segregated by staining intensity in the  
865 spongiotrophoblast layer and decida from placental/decidual samples from  
866 *Dmp1Cre.Pthlh<sup>ff(het)</sup>* and *Dmp1Cre<sup>(het)</sup>* embryos. (F,G) Quantitation of total decidual area  
867 and spongiotrophoblast area; mean  $\pm$  SEM with individual data points. No significant  
868 differences relating to genotype were detected by two-way ANOVA.

# Figure 1 Supplement 1

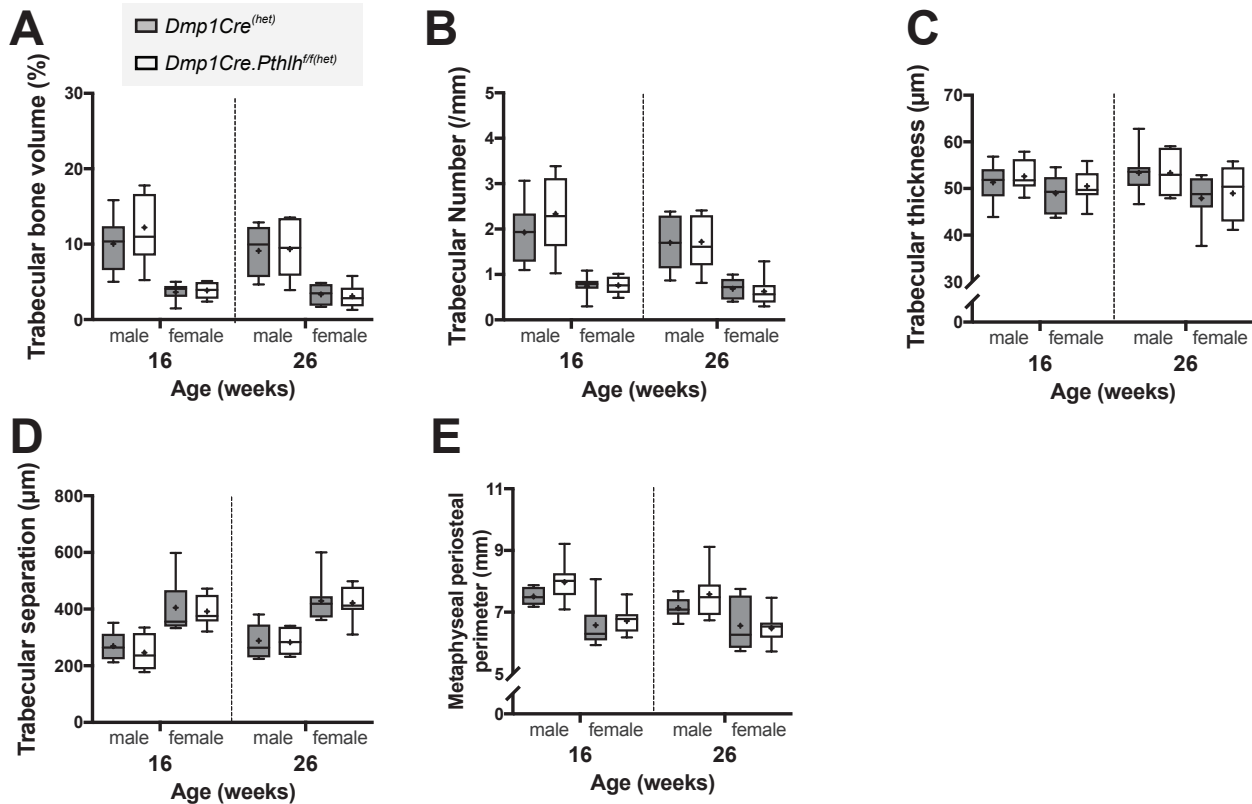

# Figure 2 Supplement 1

**A**

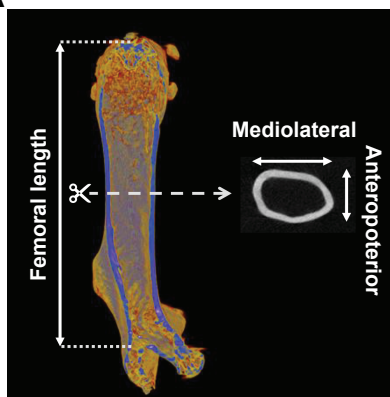

**B**

*Dmp1Cre<sup>(het)</sup>*
 *Dmp1Cre.Pthlh<sup>ff(het)</sup>*

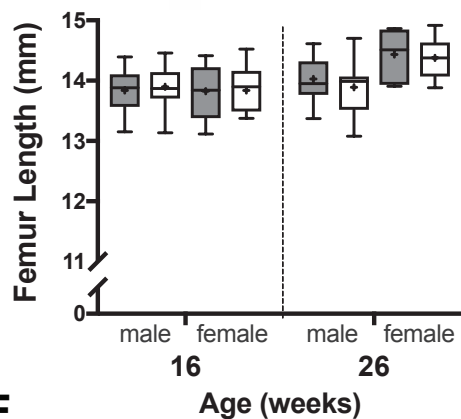

**C**

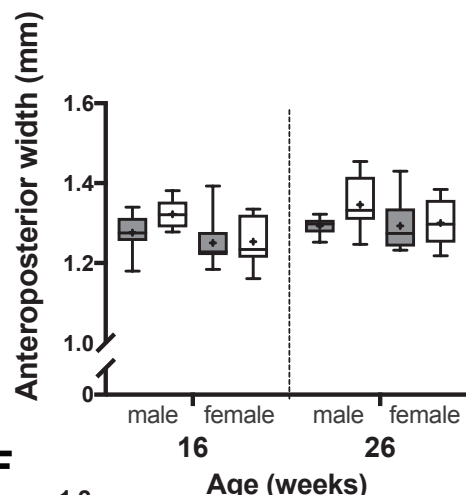

**D**

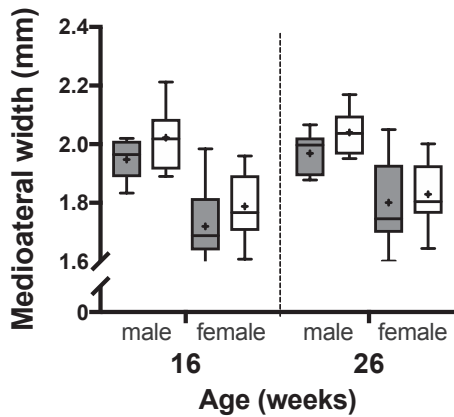

**E**

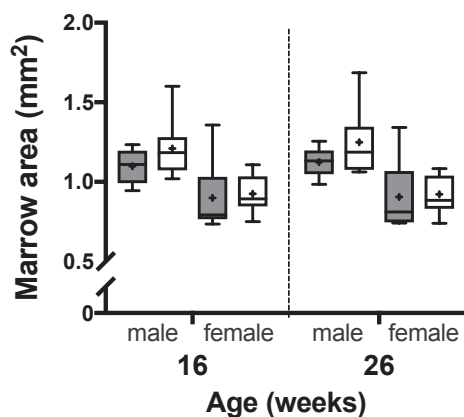

**F**

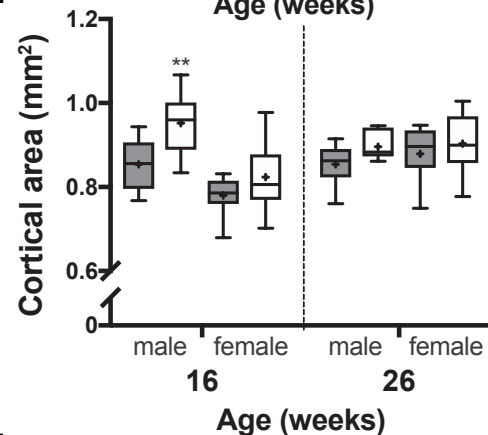

**G**

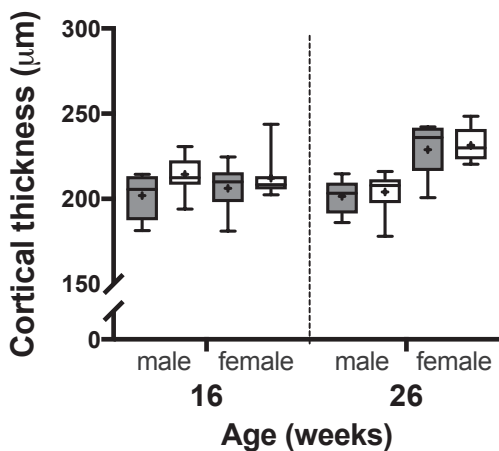

**H**

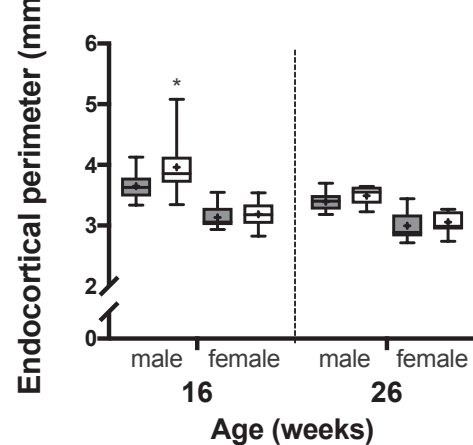

**I**

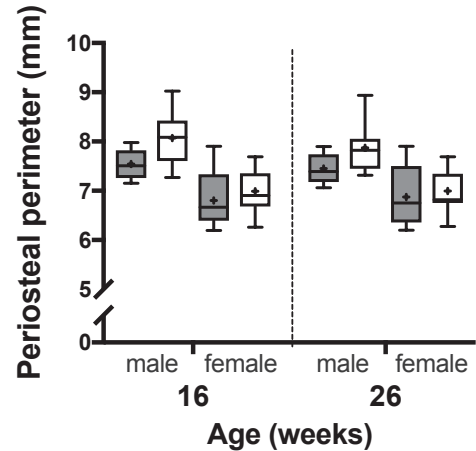

Figure 3 Supplement 1

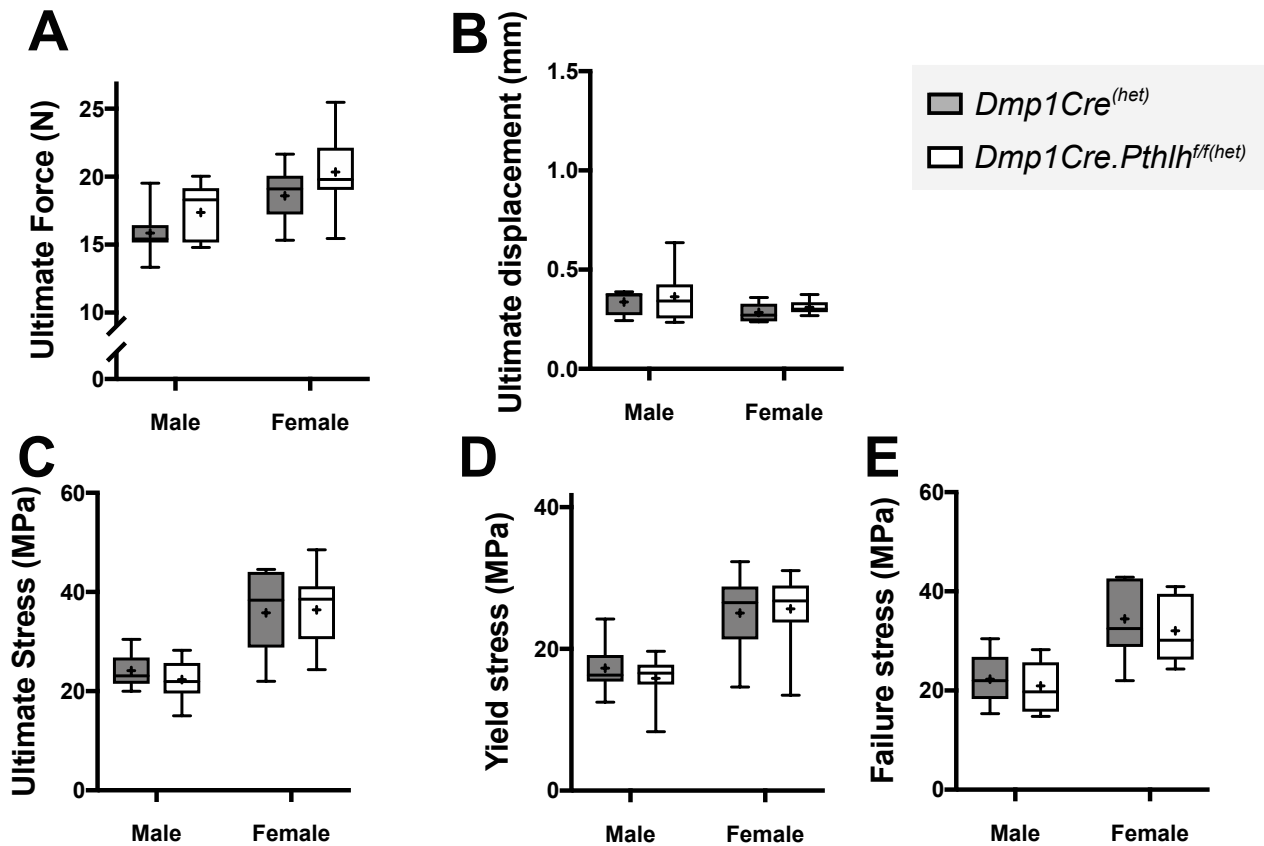

# Figure 5 Supplement 1

● *Dmp1Cre<sup>(hom)</sup>*  
○ *Dmp1Cre.Pthlh<sup>ff(hom)</sup>*

**A**

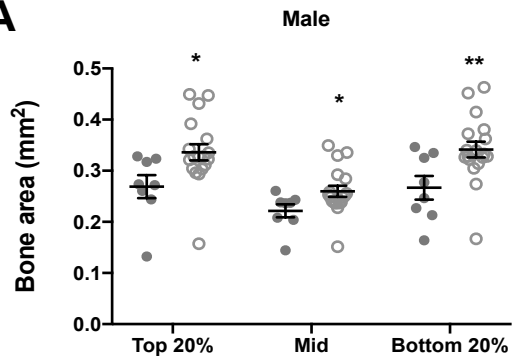

**B**

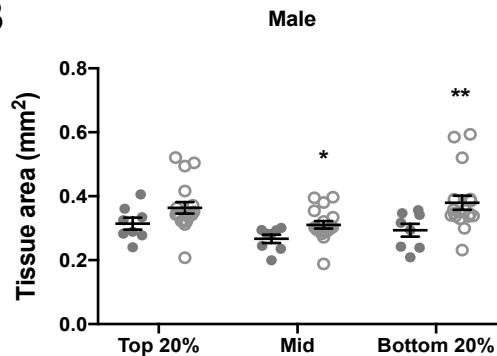

**C**

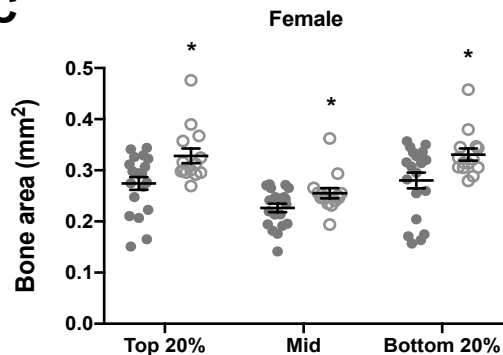

**D**

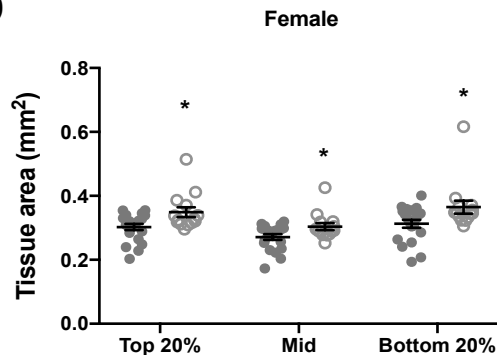

# Figure 5 Supplement 2

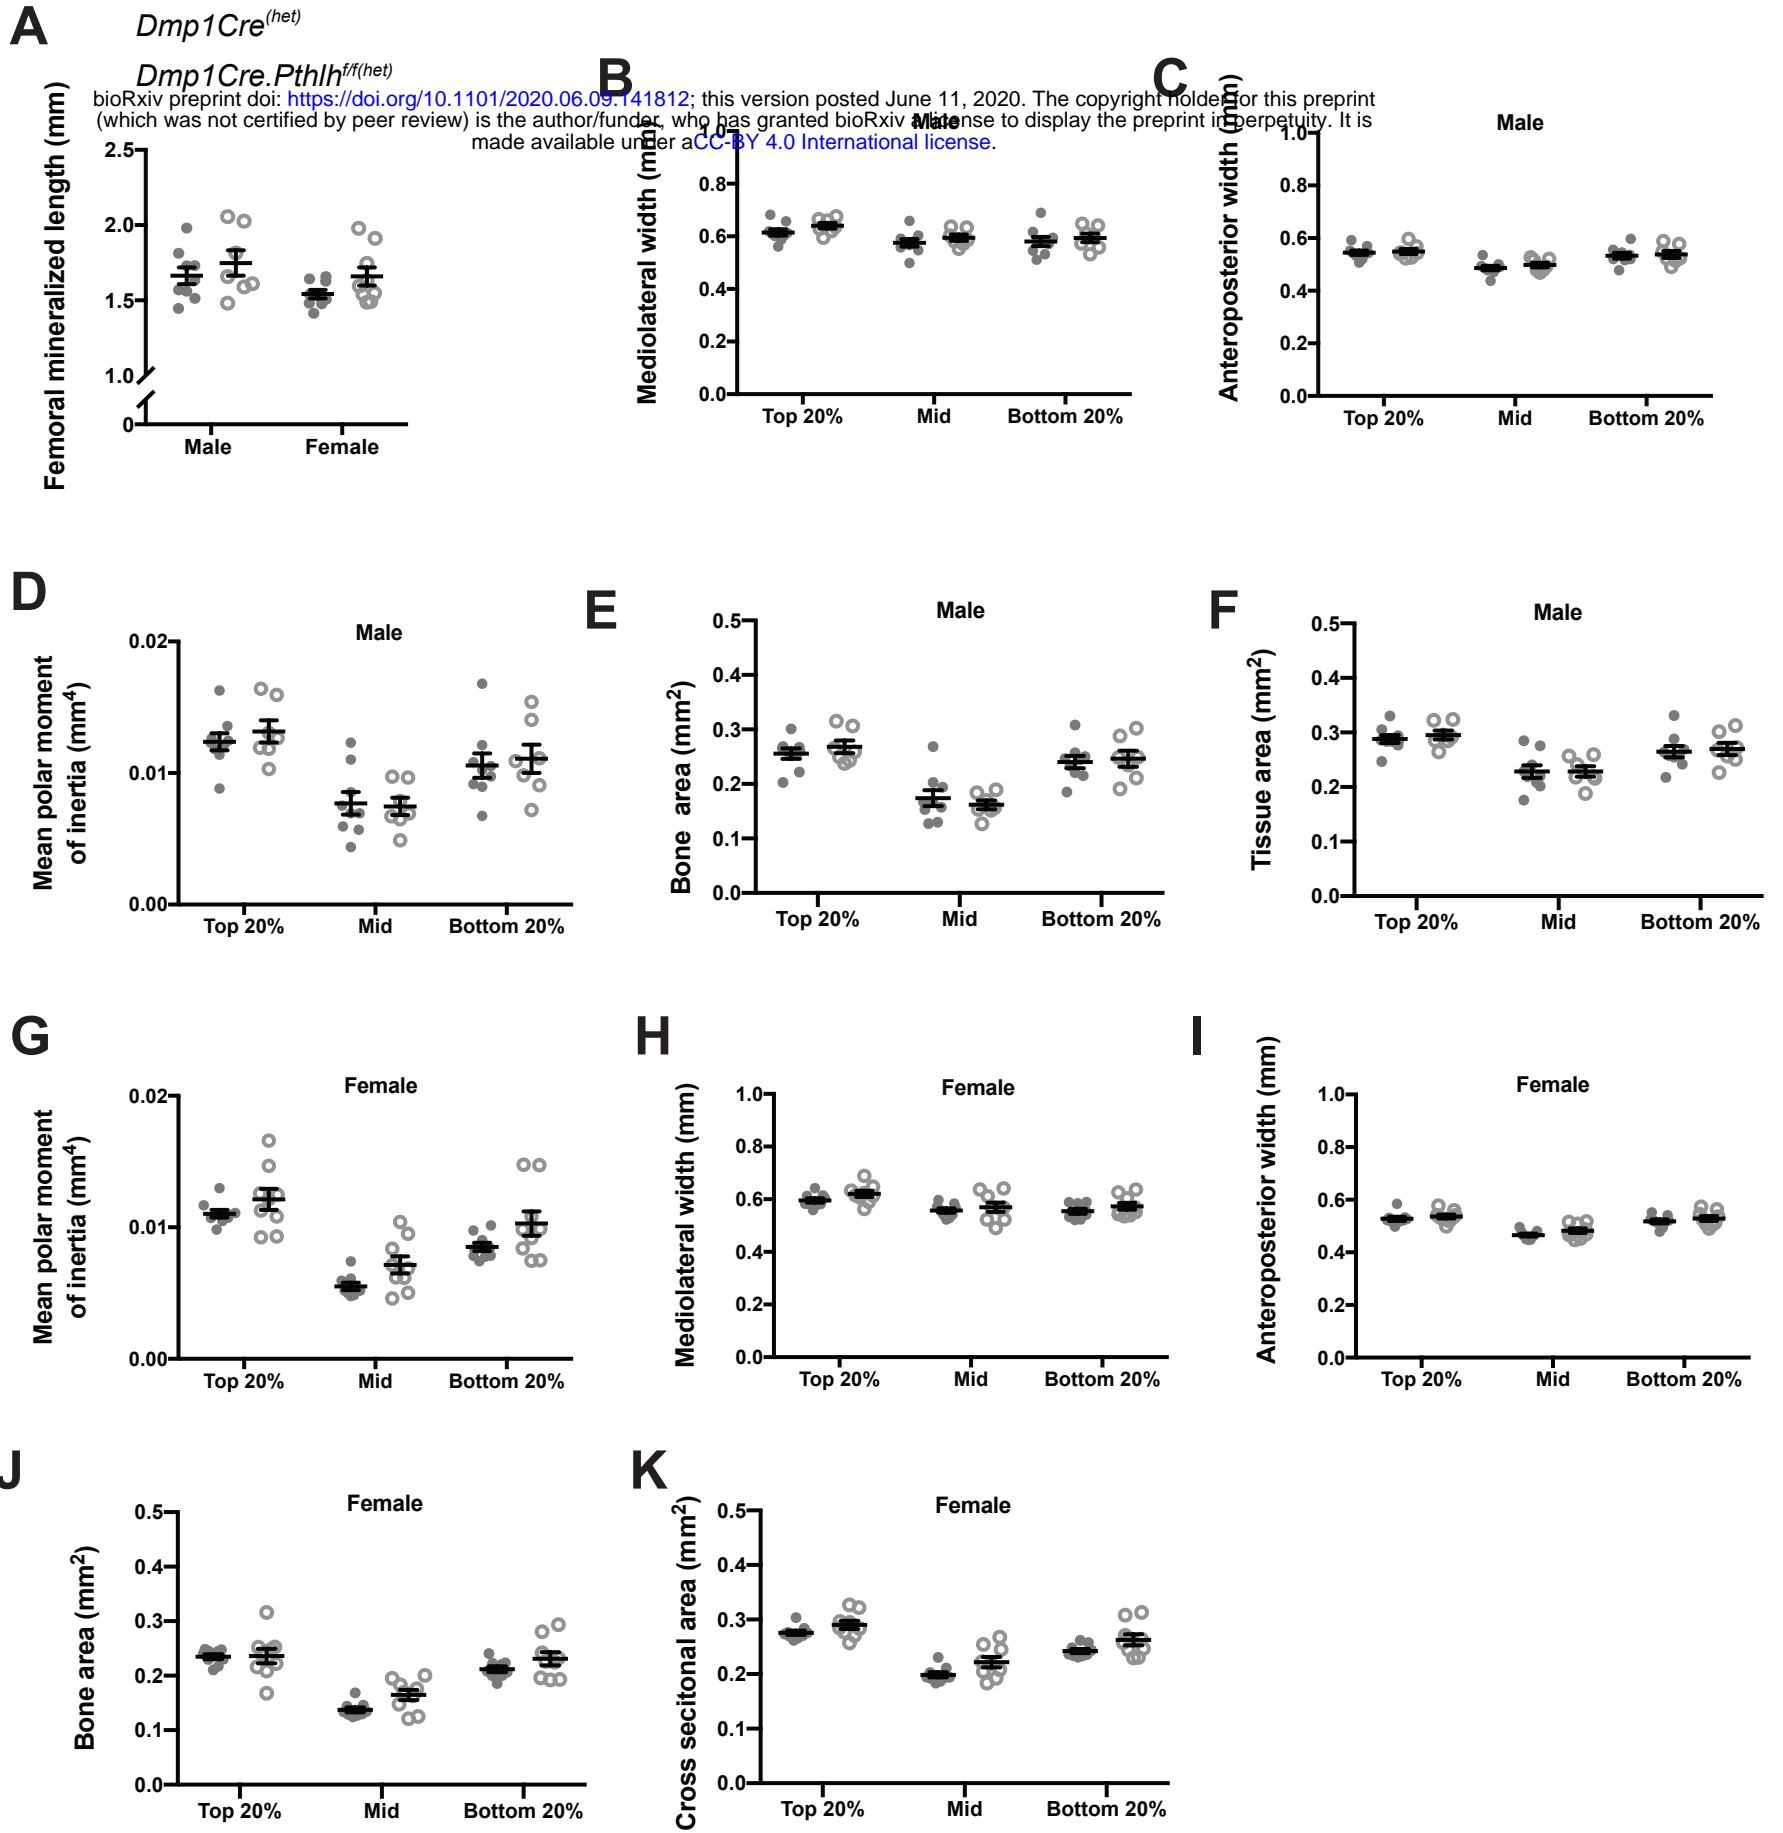



# Figure 6 Supplement 1

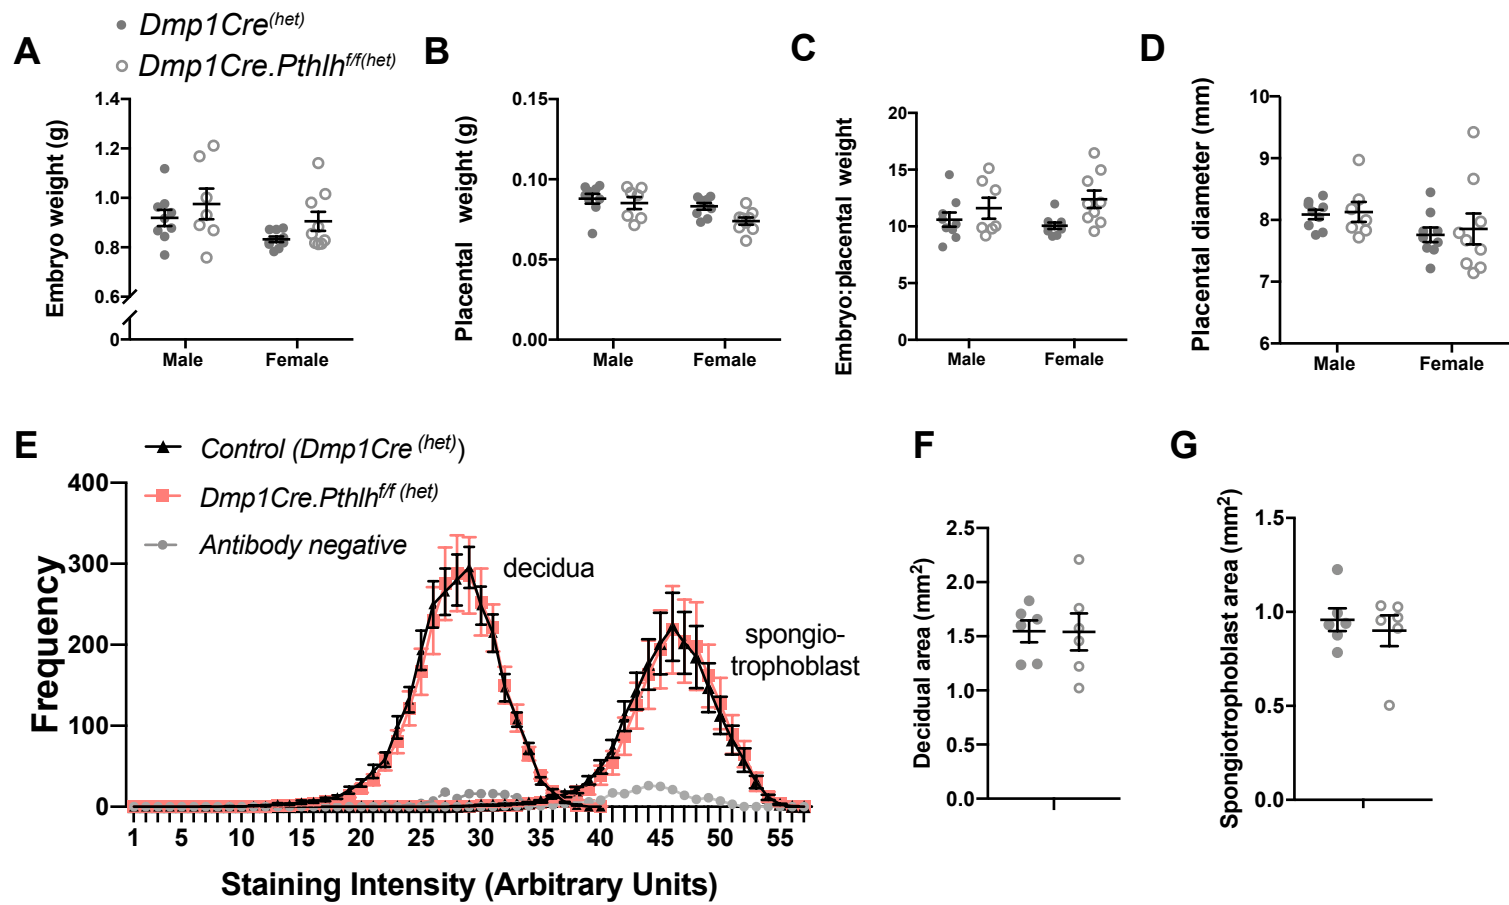

Source: https://www.biorxiv.org/content/biorxiv/early/2020/06/11/2020.06.09.141812.full.pdf
